# Supplementary material
Source: PubMed Central journal article supplement (PMC3127082)
Supplement: rna0801_0158SD1.pdf [file rna0801_0158SD1.pdf]

Deep-sequencing of human Argonaute-associated small RNAs provides insight into miRNA sorting and reveals Argonaute association with RNA fragments of diverse origin

Alexander Maxwell Burroughs<sup>\*^</sup>, Yoshinari Ando<sup>\*^</sup>, Michiel Laurens de Hoon, Yasuhiro Tomaru, Harukazu Suzuki, Yoshihide Hayashizaki, Carsten Olivier Daub

**SUPPLEMENTARY MATERIAL**

Omics Science Center (OSC), RIKEN Yokohama Institute, 1-7-22, Suehiro-cho, Tsurumi-ku, Yokohama-shi, 230-0045, Kanagawa, Japan

\*- These authors contributed equally to this work

<sup>^</sup>-corresponding authors

## **TABLE OF CONTENTS**

- I. SUPPLEMENTARY DISCUSSION/METHODS**
- II. SUPPLEMENTARY FIGURE LEGENDS**
- III. SUPPLEMENTARY REFERENCES**
- IV. SUPPLEMENTARY FIGURES S1-S8**
- V. SUPPLEMENTARY TABLES S1-S8**

## I. SUPPLEMENTARY DISCUSSION/METHODS

### *Handling tags that fail to match exactly to the genome*

The most compelling reasons to include tags that do not match exactly to the genome in analyses like the ones presented in this study are 1) the demonstrated effects of nucleotidyltransferase enzymes in altering the 3' ends of classes of small RNA (1), (2), (3), (4), (5), (6) and 2) the observation that classes of non-coding RNA are subjected to chemical modification events or RNA editing events (7), (8), (9). Having said this, in the interest of avoiding reporting false positives, we decided against including potential RNA precursors wherein the most frequently-mapping tag was not exactly matching unless there was compelling evidence otherwise. For example, tags mapping to the *CYP46A1* mRNA gene contain two mismatches (Table 2), but we feel these mismatches represent *bona fide* THP-1 specific SNPs because 1) the tags map to no other location in the genome exactly, with one mismatch or with two mismatches 2) all tags mapping to this portion of the genome contain the mismatches, and 3) the resulting change to the *CYP46A1* exon results in a conservative amino acid substitution from a leucine to an isoleucine residue, a substitution shared in *CYP46A1* gene homologues from closely-related organisms (see Fig. 3B).

### *quantitative RT-PCR (qRT-PCR)*

qRT-PCR was performed in 20- $\mu$ l reaction mixture with 2 $\mu$ l of the RT reaction (Materials and Methods) and 2x QuantiTect SYBR Green RT-PCR Master Mix (Qiagen) using the specific primer and miScript Universal primer on an ABI 7500 Fast real time PCR system (Applied Biosystems). PCR parameters consisted of heating at 95°C for 15 min, followed by 40 cycles of 94°C for 15 s, 60°C for 30 s and 70°C for 20 s. The following primers were used as the specific primer in addition to primers listed in the Materials and Methods of the main text: *CYP46A1*-F (5'-AGATGTACCGTGCGATTTCAGAC-3'), tRNA-His-GTG-F (5'-CGTATAGTGGTTAGTACTCTGCG-3'). RNU1A miScript primer (Hs\_RNU1A\_1, Qiagen) was used as an internal expression control.

## II. SUPPLEMENTARY FIGURE LEGENDS

**Supplementary Figure S1. Pairing probability profile comparison for miRNA loci enriched in their association across all AGO proteins and miRNA loci depleted in their association across all AGO proteins.** (A) Boxplots depict pairing probabilities, representing the double-stranded character, along the miRNA strand from positions 1-19. Boxplots in the left-hand column correspond to double-stranded character of the set of miRNA enriched across all Ago proteins while boxplots to the right correspond to double-stranded character of the set of miRNA depleted across all Ago proteins. Profiles were constructed in each AGO-library, to account for potential differences in primary mature isomir and primary star isomir (Materials and Methods). (B) P-values of Wilcoxon rank sum test generated from comparing the pairing probabilities at nucleotide positions 1-19 are plotted. Red line plotted at the designated level of significance,  $p=0.01$ .

**Supplementary Figure S2. qRT-PCR validation of selected findings.** (A) Ct values from qRT-PCR experiments for miR-338-3p, as-miR-338-5p, miR-155, *CYP146A1*, tRNA<sup>His-GTG</sup>, and RNU1A (primers designed for as-miR-155 failed to amplify) in THP-1 complete cell RNA extract (n=3). (B) Ct values from qRT-PCR for miR-338-3p, as-miR-338-5p, and miR-155 (as-miR-155 failed to amplify) in HeLa

complete cell RNA extract (n=2). (C) Ct values from qRT-PCR for CYP46A1, tRNA<sup>His-GTG</sup>, miR-338-3p, as-miR-338-5p, and miR-155 (primers designed for as-miR-155 failed to amplify) in RNA extracted from AGO1-, AGO2-, and AGO3-IP experiments (n=3, except for miR-338-3p and as-miR-338-5p where n=2). (D) Gel electrophoresis of qRT-PCR amplified products. Primers designed for tRNA<sup>His-GTG</sup> are detecting the fragment identified in deep sequenced libraries, not the full-length tRNA.

**Supplementary Figure S3. Alignments of putative seed regions from sequences identified in Table 2.** Alignments of all putative seed regions wherein sufficient homology to construct an alignment between regions exists. Regions of homology are identified by axtChain program (10), which is based on BLASTZ (11) whole genome alignments. Alignments constructed for all species for which axtChain (10) identifies a homologous region.

**Supplementary Figure S4. Comparison of distances of 21-base pair mature miRNA and 29-base pair tRNA fragment identified as associating with the AGO1 protein.** Rendering of ribbon backbone of tRNA<sup>GLU-CTC</sup> (12) and 21 bases of a single strand of synthetic 24-basepair miRNA duplex (13). The tRNA fragment identified in Ago1 library is colored green on the structure of the tRNA. Dashed yellow lines trace distance between the terminal atoms of the tRNA fragment and miRNA strand, with distance in Angstroms labeled to the right. Despite difference in absolute nucleotide length, distance between ends of the tRNA fragment is consistent with established length of DICER1-mediated cleavage (14), (15). RNA rendered in SWISS-PDB Viewer (16).

**Supplementary Figure S5. Superimposition of tRNA<sup>GLU-CTC</sup> on active site of DICER1 enzyme (14).** DICER1 is rendered as a ribbon drawing with helices in purple and strands in orange and manganese ions as grey spheres. The tRNA structure is also rendered as a ribbon drawing and colored in grey, with the portion of the tRNA corresponding to the sequence enriched in the Ago1 library colored in green. A view of the DICER1 active site is given on the left, with known active site residues rendered as ball and stick drawings. Yellow circles highlight the location of the primary active site residues. A side view, relative to the active site, is given on the right. The location of the PAZ domain is marked by a red circle. Drawings rendered in SWISS-PDB Viewer (16).

**Supplementary Figure S6. Distribution of tag counts over randomized genome regions.** x-axis of all plots measures tag counts recovered in randomized genome regions over 1000 trials, y-axis measures the number of trials which recovered a given tag count. Red line at the right of each plot is located at the number of actual tags in the AGO-IP libraries recovered from promoter regions.

**Supplementary Figure S7. Distance from TSS and length distribution of promoter-derived, AGO-associating short RNA tags.** (A) Histogram reporting total counts of 5' start sites for unique, promoter-derived, AGO-associating tags in 10-bp windows around the Refseq-defined TSS (tags from all AGO-IP libraries are pooled). Relative increased concentration between 0 and -100 nucleotides from the transcription start site roughly agrees with similar distributions for tRNA and TSSa-RNAs (17),(18). (B) Length distributions for complete cell and pooled AGO-IP promoter-derived tags. The AGO-IP libraries are noticeably shifted to the right, largely lacking the 18-19 basepair tag lengths seen in the complete cell RNA.

**Supplementary Figure S8. Distribution of miRNA loci with recovered anti-sense tags across genome features.** An observation that anti-sense miRNA tags are disproportionately recovered from intronic regions prompted an investigation into the genome location of asmiRNA loci across different species. The proportion of miRNA loci with anti-sense tags are plotted against the background of all sense miRNA loci across different species. Genome locations are color-coded according to the legend on the right. Abbreviations used: as, anti-sense; hsa, *Homo sapiens*; mmu, *Mus musculus*; gga, *Gallus gallus*; dme, *Drosophila melanogaster*; cel, *Caenorhabditis elegans*; ath, *Arabidopsis thaliana*.

### III. SUPPLEMENTARY REFERENCES

1. Hagan, J.P., Piskounova, E. and Gregory, R.I. (2009) Lin28 recruits the TUTase Zcchc11 to inhibit let-7 maturation in mouse embryonic stem cells. *Nat Struct Mol Biol*, **16**, 1021-1025.
2. Katoh, T., Sakaguchi, Y., Miyauchi, K., Suzuki, T., Kashiwabara, S. and Baba, T. (2009) Selective stabilization of mammalian microRNAs by 3' adenylation mediated by the cytoplasmic poly(A) polymerase GLD-2. *Genes Dev*, **23**, 433-438.
3. Lehrbach, N.J., Armisen, J., Lightfoot, H.L., Murfitt, K.J., Bugaut, A., Balasubramanian, S. and Miska, E.A. (2009) LIN-28 and the poly(U) polymerase PUP-2 regulate let-7 microRNA processing in *Caenorhabditis elegans*. *Nat Struct Mol Biol*, **16**, 1016-1020.
4. Heo, I., Joo, C., Kim, Y.K., Ha, M., Yoon, M.J., Cho, J., Yeom, K.H., Han, J. and Kim, V.N. (2009) TUT4 in concert with Lin28 suppresses microRNA biogenesis through pre-microRNA uridylation. *Cell*, **138**, 696-708.
5. Jones, M.R., Quinton, L.J., Blahna, M.T., Neilson, J.R., Fu, S., Ivanov, A.R., Wolf, D.A. and Mizgerd, J.P. (2009) Zcchc11-dependent uridylation of microRNA directs cytokine expression. *Nat Cell Biol*, **11**, 1157-1163.
6. Burroughs, A.M., Ando, Y., de Hoon, M.J., Tomaru, Y., Nishibu, T., Ukekawa, R., Funakoshi, T., Kurokawa, T., Suzuki, H., Hayashizaki, Y. *et al.* A comprehensive survey of 3' animal miRNA modification events and a possible role for 3' adenylation in modulating miRNA targeting effectiveness. *Genome Res*.
7. de Hoon, M.J., Taft, R.J., Hashimoto, T., Kanamori-Katayama, M., Kawaji, H., Kawano, M., Kishima, M., Lassmann, T., Faulkner, G.J., Mattick, J.S. *et al.* (2010) Cross-mapping and the identification of editing sites in mature microRNAs in high-throughput sequencing libraries. *Genome Res*, **20**, 257-264.
8. Reid, J.G., Nagaraja, A.K., Lynn, F.C., Drabek, R.B., Muzny, D.M., Shaw, C.A., Weiss, M.K., Naghavi, A.O., Khan, M., Zhu, H. *et al.* (2008) Mouse let-7 miRNA populations exhibit RNA editing that is constrained in the 5'-seed/ cleavage/anchor regions and stabilize predicted mmu-let-7a:mRNA duplexes. *Genome Res*, **18**, 1571-1581.
9. Ebhardt, H.A., Tsang, H.H., Dai, D.C., Liu, Y., Bostan, B. and Fahlman, R.P. (2009) Meta-analysis of small RNA-sequencing errors reveals ubiquitous post-transcriptional RNA modifications. *Nucleic Acids Res*, **37**, 2461-2470.
10. Kent, W.J., Baertsch, R., Hinrichs, A., Miller, W. and Haussler, D. (2003) Evolution's cauldron: duplication, deletion, and rearrangement in the mouse and human genomes. *Proc Natl Acad Sci U S A*, **100**, 11484-11489.
11. Schwartz, S., Kent, W.J., Smit, A., Zhang, Z., Baertsch, R., Hardison, R.C., Haussler, D. and Miller, W. (2003) Human-mouse alignments with BLASTZ. *Genome Res*, **13**, 103-107.
12. Numata, T., Ikeuchi, Y., Fukai, S., Suzuki, T. and Nureki, O. (2006) Snapshots of tRNA sulphuration via an adenylated intermediate. *Nature*, **442**, 419-424.

13. Okada, C., Yamashita, E., Lee, S.J., Shibata, S., Katahira, J., Nakagawa, A., Yoneda, Y. and Tsukihara, T. (2009) A high-resolution structure of the pre-microRNA nuclear export machinery. *Science*, **326**, 1275-1279.
14. Macrae, I.J., Zhou, K., Li, F., Repic, A., Brooks, A.N., Cande, W.Z., Adams, P.D. and Doudna, J.A. (2006) Structural basis for double-stranded RNA processing by Dicer. *Science*, **311**, 195-198.
15. MacRae, I.J., Zhou, K. and Doudna, J.A. (2007) Structural determinants of RNA recognition and cleavage by Dicer. *Nat Struct Mol Biol*, **14**, 934-940.
16. Guex, N. and Peitsch, M.C. (1997) SWISS-MODEL and the Swiss-PdbViewer: an environment for comparative protein modeling. *Electrophoresis*, **18**, 2714-2723.
17. Taft, R.J., Glazov, E.A., Cloonan, N., Simons, C., Stephen, S., Faulkner, G.J., Lassmann, T., Forrest, A.R., Grimmond, S.M., Schroder, K. *et al.* (2009) Tiny RNAs associated with transcription start sites in animals. *Nat Genet*, **41**, 572-578.
18. Seila, A.C., Calabrese, J.M., Levine, S.S., Yeo, G.W., Rahl, P.B., Flynn, R.A., Young, R.A. and Sharp, P.A. (2008) Divergent transcription from active promoters. *Science*, **322**, 1849-1851.
19. Marson, A., Levine, S.S., Cole, M.F., Frampton, G.M., Brambrink, T., Johnstone, S., Guenther, M.G., Johnston, W.K., Wernig, M., Newman, J. *et al.* (2008) Connecting microRNA genes to the core transcriptional regulatory circuitry of embryonic stem cells. *Cell*, **134**, 521-533.
20. Babiarz, J.E., Ruby, J.G., Wang, Y., Bartel, D.P. and Blelloch, R. (2008) Mouse ES cells express endogenous shRNAs, siRNAs, and other Microprocessor-independent, Dicer-dependent small RNAs. *Genes Dev*, **22**, 2773-2785.
21. Tam, O.H., Aravin, A.A., Stein, P., Girard, A., Murchison, E.P., Cheloufi, S., Hodges, E., Anger, M., Sachidanandam, R., Schultz, R.M. *et al.* (2008) Pseudogene-derived small interfering RNAs regulate gene expression in mouse oocytes. *Nature*, **453**, 534-538.
22. Glazov, E.A., Cottee, P.A., Barris, W.C., Moore, R.J., Dalrymple, B.P. and Tizard, M.L. (2008) A microRNA catalog of the developing chicken embryo identified by a deep sequencing approach. *Genome Res*, **18**, 957-964.
23. Chung, W.J., Okamura, K., Martin, R. and Lai, E.C. (2008) Endogenous RNA interference provides a somatic defense against *Drosophila* transposons. *Curr Biol*, **18**, 795-802.
24. Czech, B., Malone, C.D., Zhou, R., Stark, A., Schlingeheyde, C., Dus, M., Perrimon, N., Kellis, M., Wohlschlegel, J.A., Sachidanandam, R. *et al.* (2008) An endogenous small interfering RNA pathway in *Drosophila*. *Nature*, **453**, 798-802.
25. Batista, P.J., Ruby, J.G., Claycomb, J.M., Chiang, R., Fahlgren, N., Kasschau, K.D., Chaves, D.A., Gu, W., Vasale, J.J., Duan, S. *et al.* (2008) PRG-1 and 21U-RNAs interact to form the piRNA complex required for fertility in *C. elegans*. *Mol Cell*, **31**, 67-78.
26. Kato, M., de Lencastre, A., Pincus, Z. and Slack, F.J. (2009) Dynamic expression of small non-coding RNAs, including novel microRNAs and piRNAs/21U-RNAs, during *Caenorhabditis elegans* development. *Genome Biol*, **10**, R54.
27. German, M.A., Pillay, M., Jeong, D.H., Hetawal, A., Luo, S., Janardhanan, P., Kannan, V., Rymarquis, L.A., Nobuta, K., German, R. *et al.* (2008) Global identification of microRNA-target RNA pairs by parallel analysis of RNA ends. *Nat Biotechnol*, **26**, 941-946.

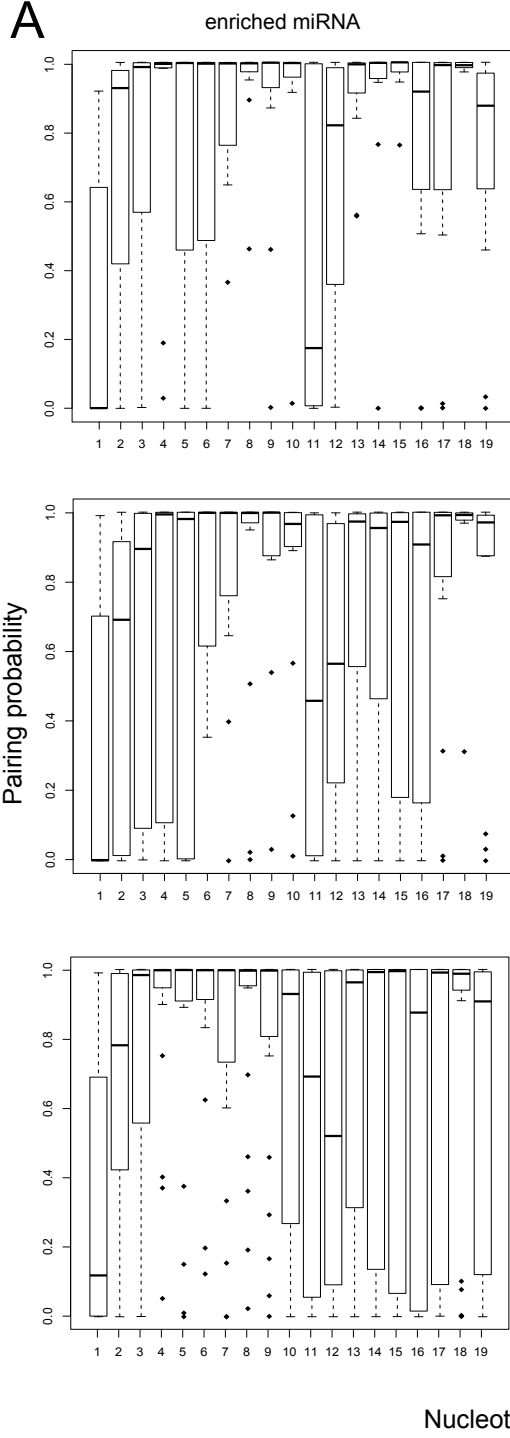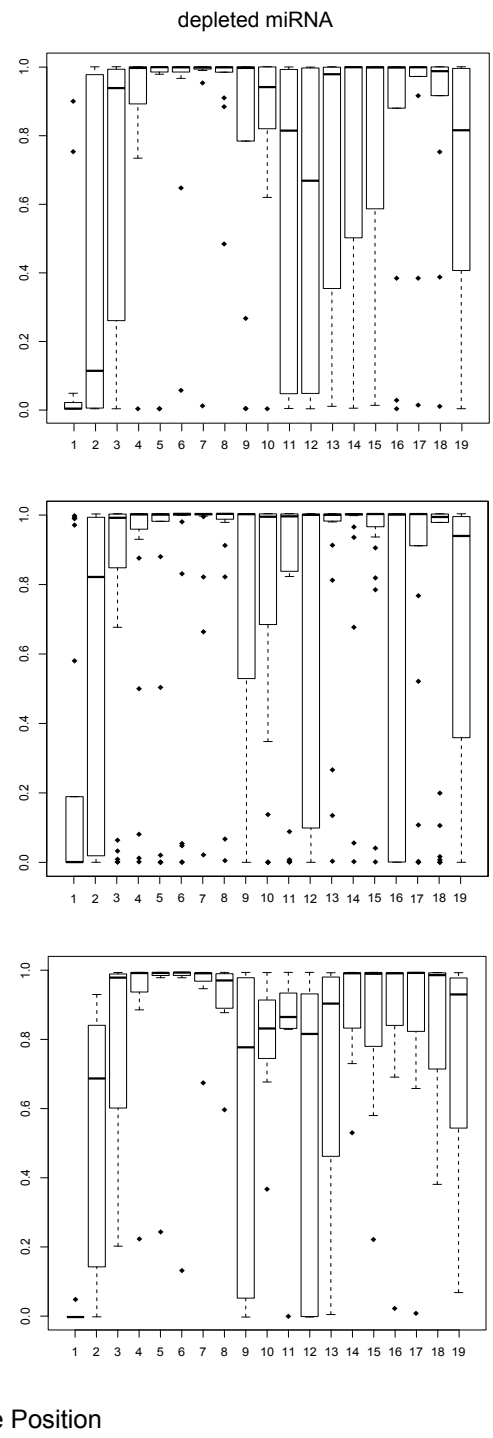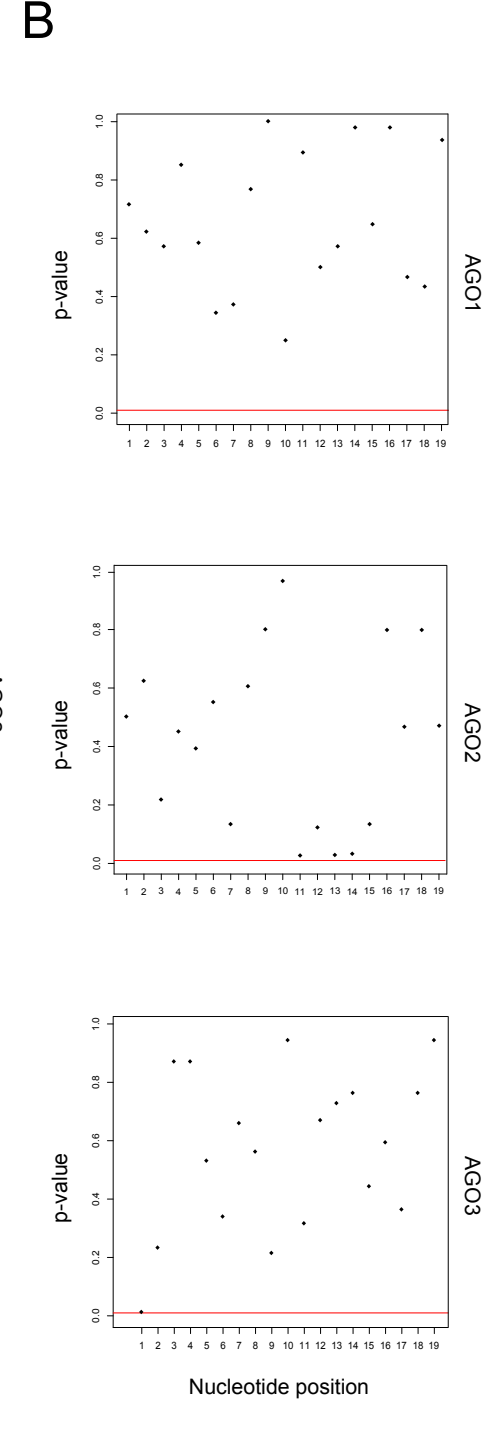

Supplementary Figure S1.

**A**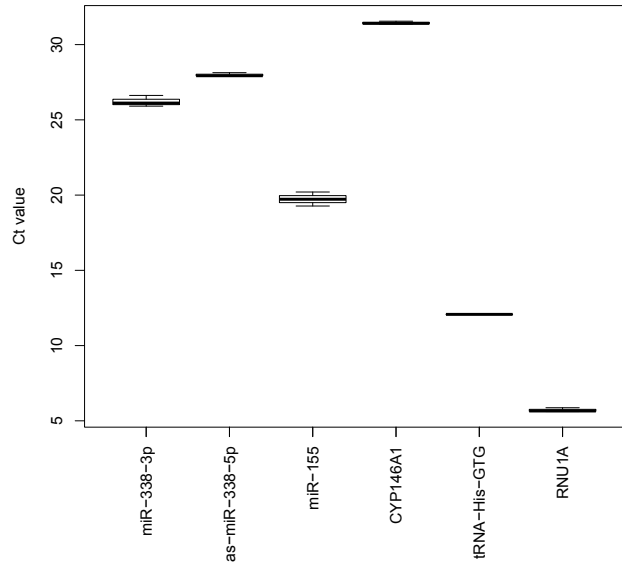**B**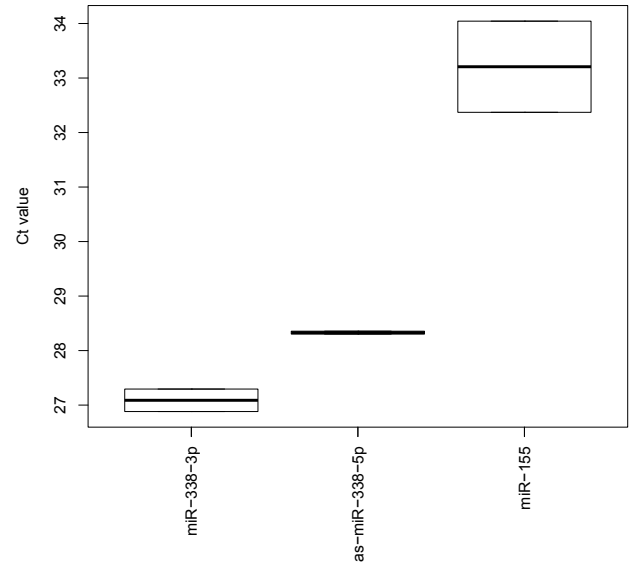**C**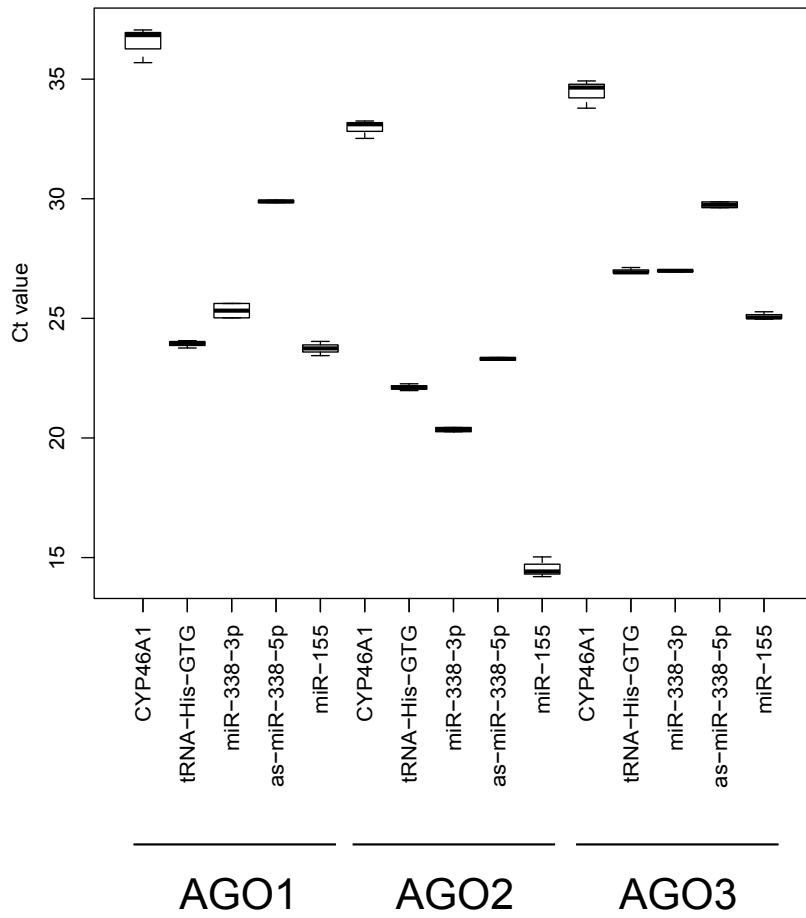**D**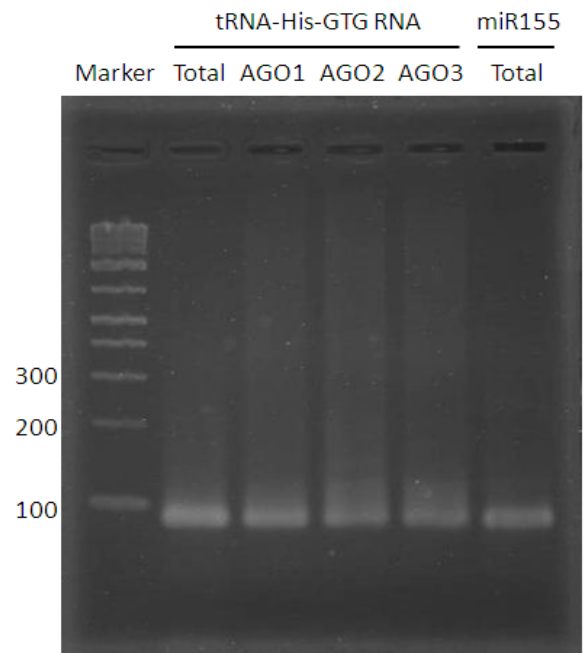

Supplementary Figure S2.



Supplementary Figure S3. Alignments of putative seed regions from sequences identified in Table 2.

## ##U12 alignment

```
seed      GAUGCCU
human     GGAUGCCUGGGAGUUGCGAUCUGCCCG
mouse     GGAUGCCUGGGUGACGCGAUCUGCCCG
rat       GGAUGCCUAGGUAACGCGAUCUGCCCG
dog       GGAUGCCUGGGAGCCGCGAUCUGCCCG
chicken   GGAUGCCCAGGUGCAAUGAUCUGCCCG
```

##U1--little to no conservation

##U2--little to no conservation

##U2-like--little to no conservation

##VTRNA1-1--little to no conservation

## ##ACA45

```
seed      AGGUAGA
human     AAGGUAGAUAGAACAGGUCUUG
rat       AAGGUAGAUAGAACAGGUCUUG
mouse     AAGGUAGAUAGAACAGGUCUUG
dog       AAGGUAGAUAGAACAGGUCUUG
chicken   AUGGUGGA-AGAACAAGGCCUG
```

## ##ACA25

```
seed      UUCUCUA
human     GUUCUCUAUAGGAAGCCAUAG-CA
dog       GUUCUCCAUUGGAUGCCACGGUCA
rat       GUUCUUCACAGGGCAAUUCGGGCA
mouse     GUUCUUCACAGAGAAAUCCUGCA
```

##U17a--little to no conservation

##U17b--little to no conservation

## ##HBI-100

```
seed      CUGAUCG
human     UCUGAUCGUUCCCCUCCGUACAG
mouse     UCCGAUCGUUCCCCUCCAUACAA
rat       UCUGAUCGUUACCUCCAUACAA
dog       UCUGAUCGUUCCCCUCCAUACAA
chicken   CUGGAUCGUUCCCCUCCAUACAU
```

## ##ACA47

```
seed      CGGUCUG
human     ACGGUCUGGGGAAAAGGCUCCUGUGUU
mouse     ACGGUCUGGGGAAAAGGCUCCUGUGUG
rat       ACGGUCUGGGGAAAAGGCUCCUGUGUG
dog       AUGGUCUGCGGAAAAGGCUCCUGUGUG
```

## ##ACA17

```
seed      CUGUGUC
human     UCUGUGUCAUUAGGUGGCAGAGAU
mouse     UGUGCGUCAGUAGGUGGCAGAGAG
rat       UUUGUGUCAGUAGGUGGCAGAGAG
dog       UUUGUGUCAUUAGGUGGCAGAAAAG
chicken   NUUGUGUCAUUAGGUGGCAGAGAU
```

## ##mitochondrial tRNA-Ser

```
seed      AGAAAGC
human     GAGAAAGC-UCACAAGAACUGCUAACU
mouse     AAGAAAGA-UUGCAAGAACUGCUAAUU
```

```
rat    AAGAAAGU-AUGCAAGAACUGCUAAUU
dog    GAAAAAGUACUGCAAGAACUGCUAAUU
```

## ##mitochondrial tRNA-Cys

```
seed      GCUCCGA
human     AGCUCCGAGGUG-AUUUUCAUAUUGAAUUGCA
mouse     GGUCUUUAAGGUG-AUAUUC AUGUCGAAUUGCA
rat       AGCCUUUAAGGUG-AUUAUCAUGUCGAAUUGCA
dog       AGCUCCGUGGUGAAUUUUCAUAUUGAAUUGCA
chicken   GACUCUGUAGUG-AAGUUCAUAAUGAGUUGCA
```

## ##tRNA-His-GTG--little to no conservation

## ##mitochondrial tRNA-Met

```
seed      GUAAGGU
human     AGUAAGGUCAGCU-AAAUAAGCUAUCGGGCCC
mouse     AGUAAGGUCAGCU-AAUUAAGCUAUCGGGCCC
rat       AGUAAGGUCAGCU-AACUAAGCUAUCGGGCCC
dog       AGUAAGGUCAGCUAAAUAAGCUAUCGGGCCC
chicken   AGUAAGGUCAGCU-AACUAAGCUAUCGGGCCC
```

## ##tRNA-Glu-CTC--little to no conservation

## ##tRNA-Leu-CAA--little to no conservation

## ##28S-like--little to no conservation

## ##CLTC

```
seed      AGUUGUU
human     CAGUUGUUCAUGAUUUUAGAAGCCACC
mouse     CAGCUGUUCGUGAUUUUAGAAGCCACC
rat       CAGCUGUUCAUGAUUUUAGAAGCGACC
dog       CAGCUGUUCGUGAUUUUAGAAGCCACC
chicken   UAGCUGUUCGUGAUUUUAGAAGCUACC
```

## ##WEE1

```
seed      CAAUUCU
human     UCAAUUCUAUUCGUAUUUGUUCUGCACU
rat       UCAAUUCUAUUCGUAACUGCUCUGCGCU
mouse     UCAAUUCUAUUCGUAACUGCUCUGCGCU
dog       UCAAUUCUAUUCGUAUUUGUUCUGCACU
chicken   UCAGCUCUAUCCGCAGCUCUGCGCU
```

## ##CYP46A1

```
seed      GAUGUAC
human     AGAUGUACCGUGCGCUCCAGACUGU
mouse     AGAUGUACCGCGCGCUUCAGACUGU
rat       AGAUGUACCGUGCGAUUCAGACUGU
dog       AGAUGUACCACGCAAUCCAGACUGU
```

Supplementary Figure S4.

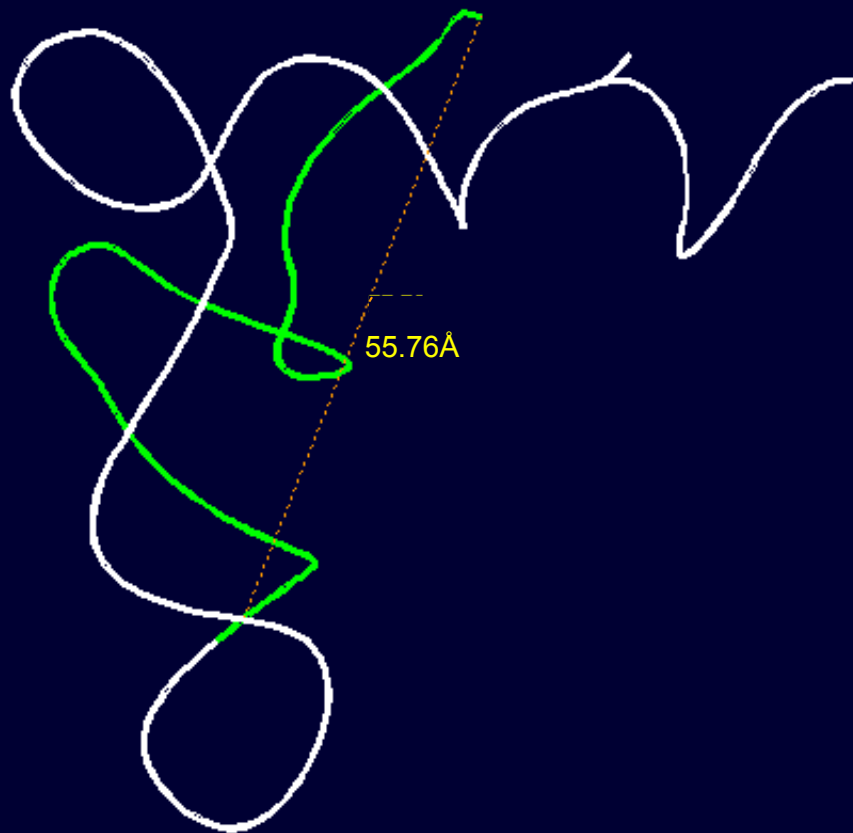

tRNA<sup>GLU</sup> (pdb: 2DER)

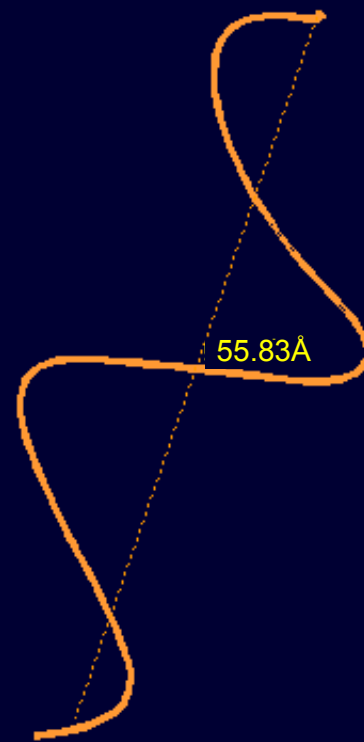

miRNA (pdb: 3A6P)

Supplementary Figure S5.

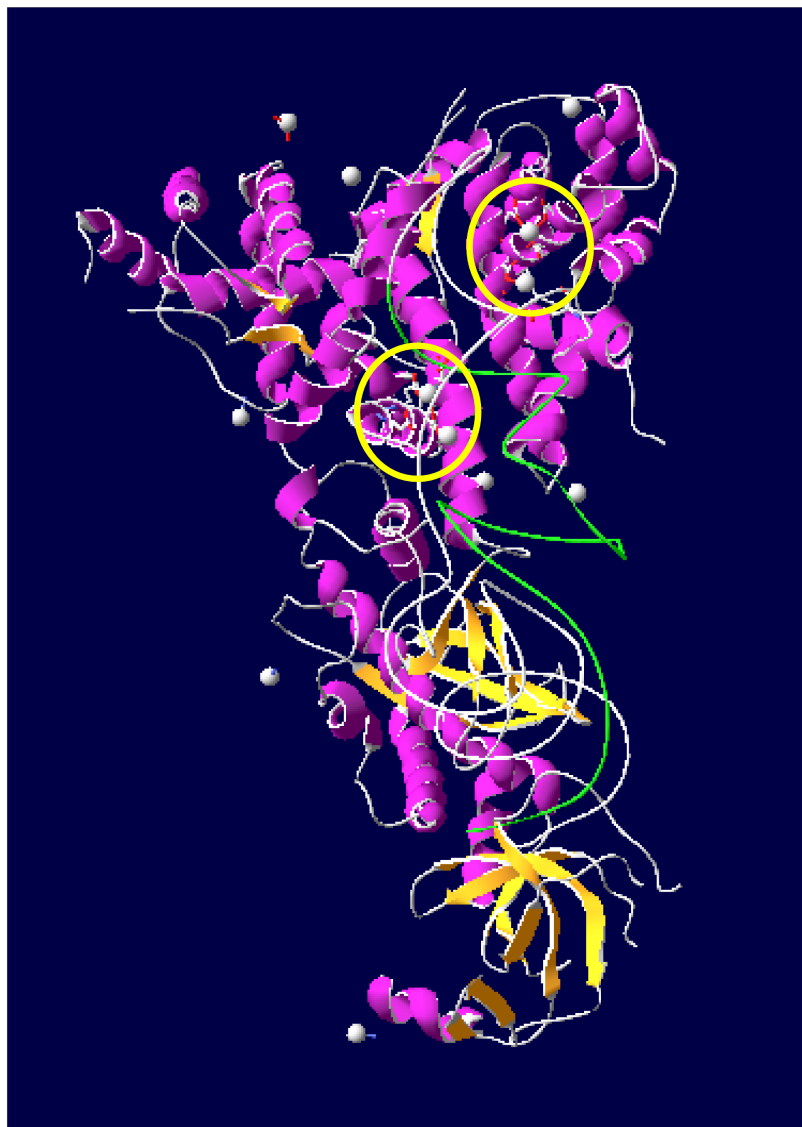

Active site view

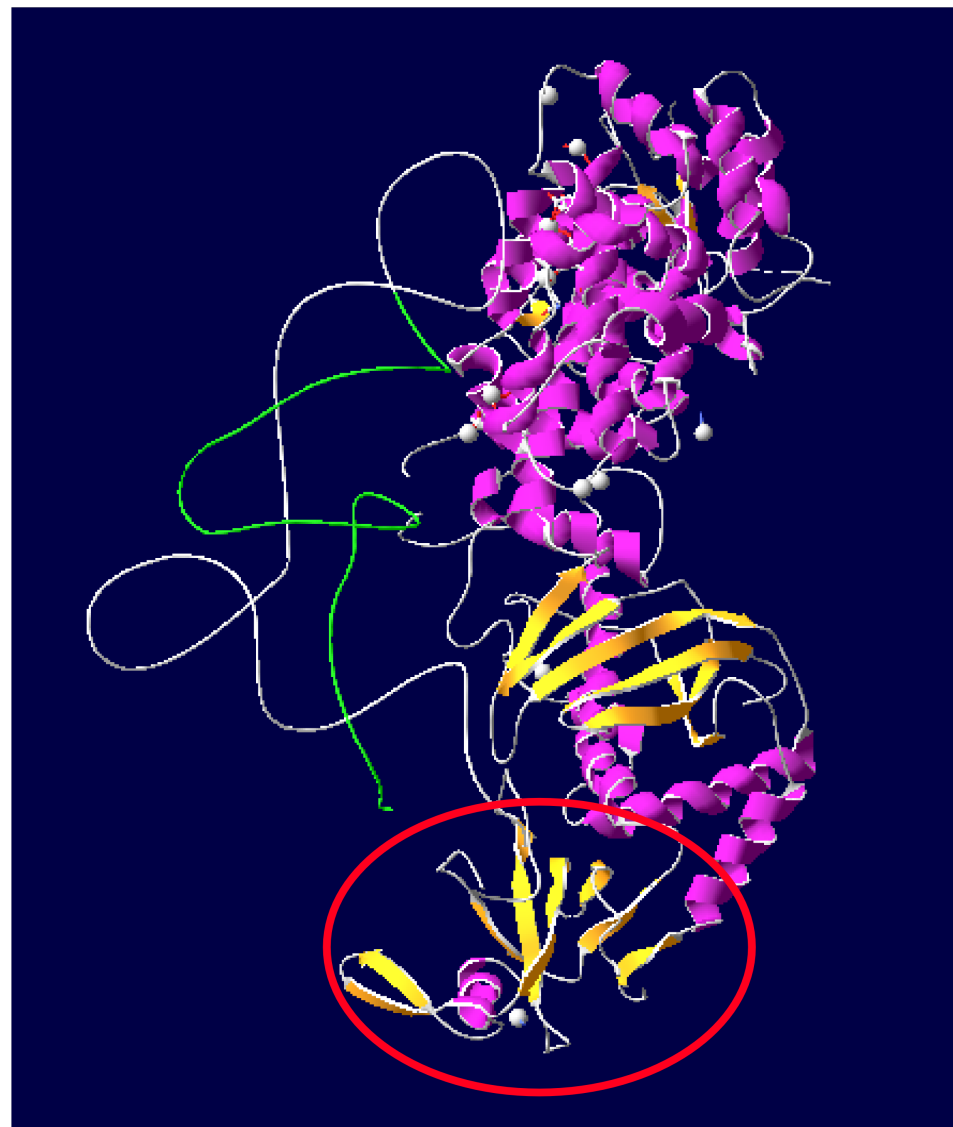

Side view

PDB: 2FFL

AGO1-IP

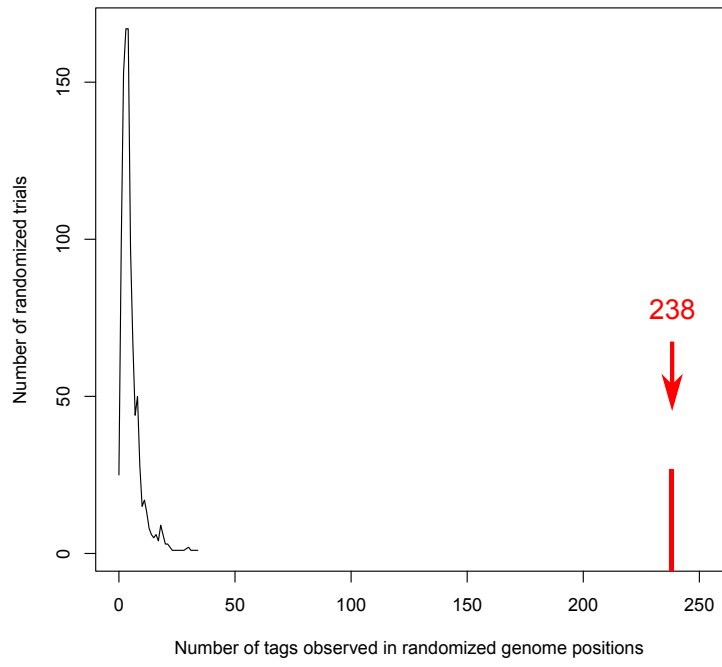

AGO2-IP

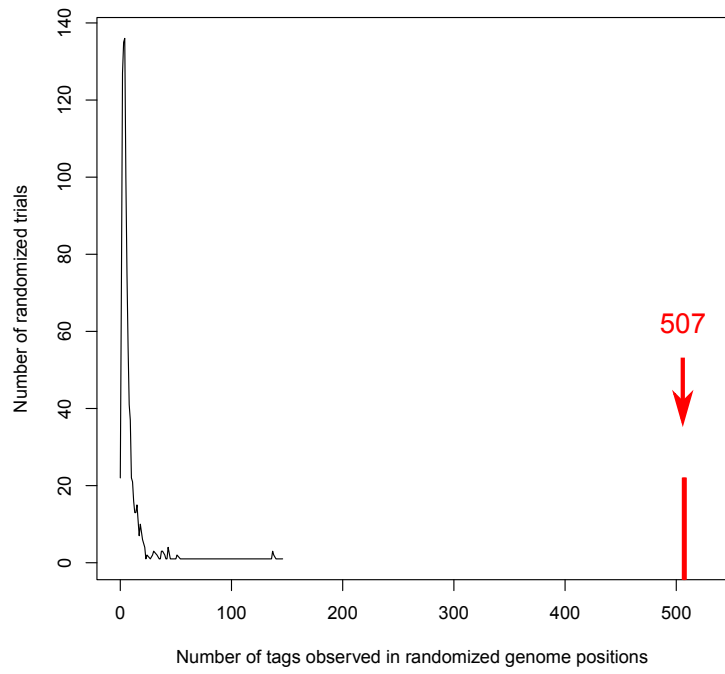

AGO3-IP

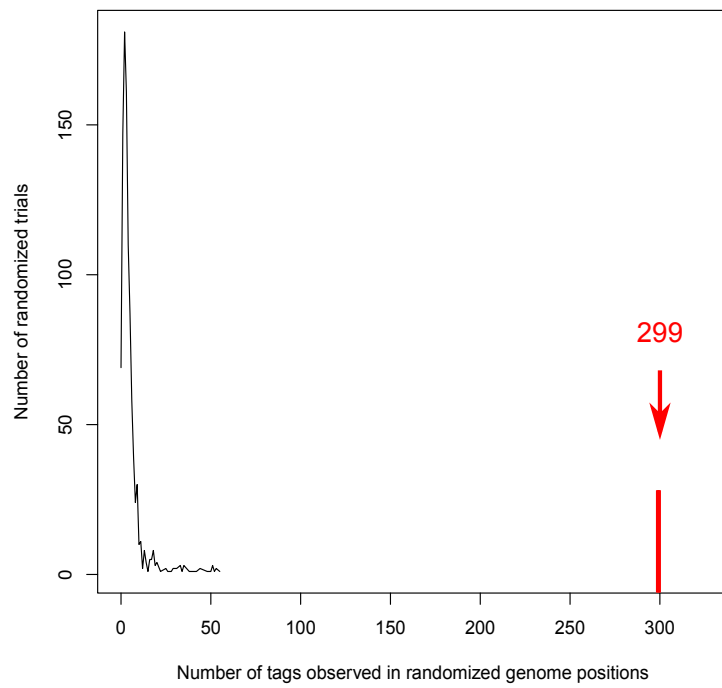

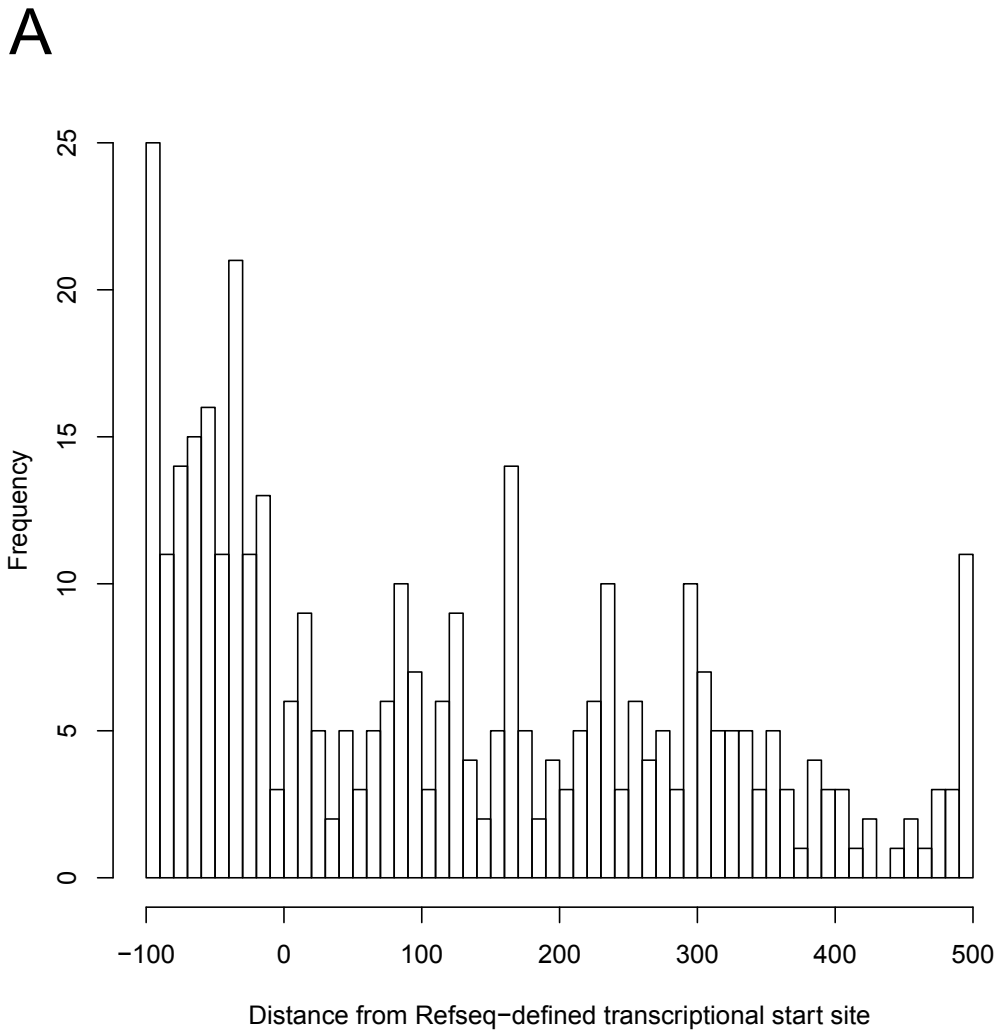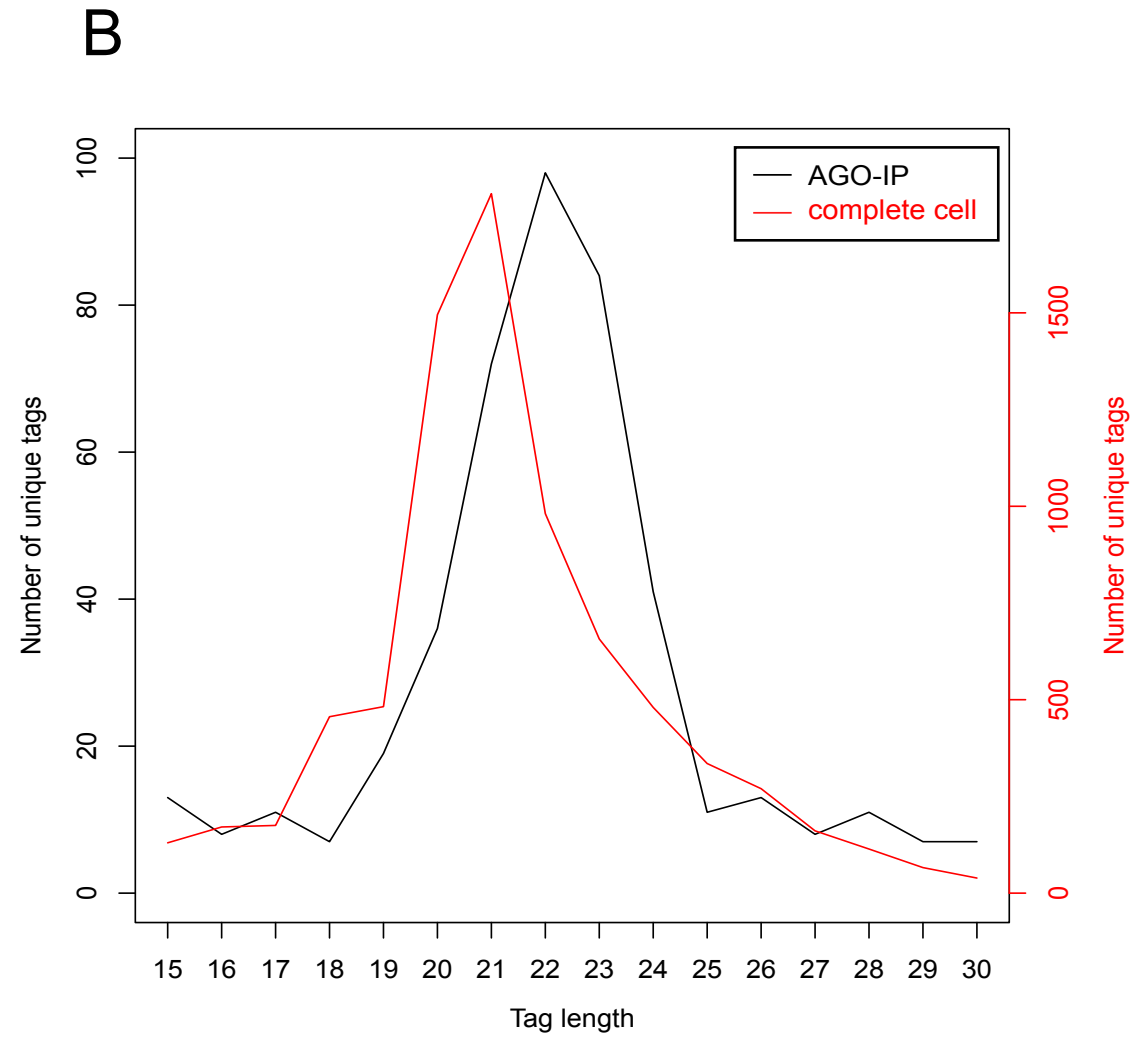

Supplementary Figure S7.



Supplementary Table S1. Raw tags counts mapping to different classes of RNA.

|            | miRNA   | snoRNA  | piRNA   | tRNA   | snRNA  | as mRNA | sense mRNA | vRNA  | other    | total   |
|------------|---------|---------|---------|--------|--------|---------|------------|-------|----------|---------|
| total cell | 2998143 | 57516.6 | 17937.8 | 5326.1 | 1986.2 | 14414.1 | 20563.0    | 377.9 | 270612.9 | 3386878 |
| AGO1-IP    | 1132269 | 2104.5  | 188.7   | 137.1  | 1232.0 | 1707.4  | 6187.0     | 19.7  | 20906.1  | 1164751 |
| AGO2-IP    | 5230907 | 4784.0  | 94.1    | 50.6   | 67.9   | 2108.5  | 5241.0     | 12.0  | 108476.5 | 5351742 |
| AGO3-IP    | 1459554 | 2403.0  | 80.3    | 46.2   | 202.8  | 1497.5  | 4210.0     | 115.9 | 23021.6  | 1491131 |



Supplementary Table S2. Normalized counts of sequences mapping to miRNA loci in the AGO1-, AGO2-, and AGO3-associating small RNA libraries.

\*\*minimum 100tpm in at least one condition

| miRNA loci      | AGO1-<br>associating | AGO2-<br>associating | AGO3-<br>associating |
|-----------------|----------------------|----------------------|----------------------|
| hsa-let-7a      | 96507.1              | 98652.0              | 102478.8             |
| hsa-let-7b      | 23367.7              | 38847.3              | 36273.1              |
| hsa-let-7d      | 1437.8               | 1249.3               | 1633.7               |
| hsa-let-7d*     | 87.8                 | 41.6                 | 114.8                |
| hsa-let-7e      | 234.7                | 290.6                | 424.8                |
| hsa-let-7f      | 57184.6              | 60343.4              | 56246.6              |
| hsa-let-7g      | 11953.6              | 12076.7              | 18551.3              |
| hsa-let-7i      | 4889.1               | 2854.9               | 3587.1               |
| hsa-miR-101     | 3207.2               | 3457.6               | 3577.4               |
| hsa-miR-103     | 13160.6              | 10479.8              | 9829.1               |
| hsa-miR-106b    | 2509.4               | 1581.0               | 2545.1               |
| hsa-miR-10a     | 111.4                | 251.6                | 136.5                |
| hsa-miR-125a-5p | 1712.2               | 2664.0               | 2108.7               |
| hsa-miR-126     | 2572.7               | 2398.2               | 2770.7               |
| hsa-miR-126*    | 814.3                | 490.4                | 1295.4               |
| hsa-miR-128     | 99.6                 | 38.1                 | 63.3                 |
| hsa-miR-1307    | 172.5                | 417.4                | 760.9                |
| hsa-miR-1307*   | 1378.0               | 519.1                | 934.1                |
| hsa-miR-130b    | 185.3                | 507.4                | 185.6                |
| hsa-miR-140-3p  | 2534.1               | 6987.5               | 3879.7               |
| hsa-miR-140-5p  | 985.8                | 656.4                | 1785.8               |
| hsa-miR-142-3p  | 129620.5             | 128978.3             | 113941.4             |
| hsa-miR-142-5p  | 1797.9               | 651.8                | 2388.5               |
| hsa-miR-143     | 311.7                | 496.1                | 372.1                |
| hsa-miR-146a    | 139.3                | 226.4                | 191.4                |
| hsa-miR-146b-5p | 5699.3               | 14394.2              | 7035.8               |
| hsa-miR-148a    | 9058.4               | 8522.1               | 5780.3               |
| hsa-miR-148b    | 2087.3               | 1596.7               | 1407.8               |
| hsa-miR-148b*   | 60.0                 | 140.3                | 132.4                |
| hsa-miR-151-3p  | 457.2                | 584.2                | 506.2                |
| hsa-miR-152     | 1531.2               | 1586.3               | 1103.9               |
| hsa-miR-155     | 9027.4               | 8018.6               | 10096.3              |
| hsa-miR-15a     | 2315.1               | 1230.3               | 1053.6               |
| hsa-miR-15b     | 512.7                | 296.4                | 298.3                |
| hsa-miR-15b*    | 32.1                 | 16.3                 | 39.1                 |
| hsa-miR-16      | 6481.4               | 6424.4               | 5195.8               |
| hsa-miR-17      | 9273.1               | 12802.2              | 9423.0               |
| hsa-miR-17*     | 493.9                | 751.9                | 1326.2               |
| hsa-miR-181a*   | 168.2                | 121.7                | 253.1                |

|                 |          |          |          |
|-----------------|----------|----------|----------|
| hsa-miR-181b    | 442.4    | 624.9    | 217.2    |
| hsa-miR-182     | 48.2     | 981.5    | 100.7    |
| hsa-miR-183     | 1762.3   | 2592.5   | 1539.9   |
| hsa-miR-185     | 1799.0   | 1565.9   | 2324.3   |
| hsa-miR-186     | 6700.1   | 7817.0   | 17184.6  |
| hsa-miR-18a     | 2308.0   | 2299.2   | 2185.4   |
| hsa-miR-191     | 17961.6  | 9304.6   | 18964.5  |
| hsa-miR-192     | 125.3    | 144.4    | 202.2    |
| hsa-miR-193a-5p | 163.9    | 146.7    | 452.1    |
| hsa-miR-196b    | 3385.3   | 3812.1   | 3056.7   |
| hsa-miR-197     | 706.1    | 351.3    | 585.3    |
| hsa-miR-199a-3p | 152.2    | 125.8    | 202.6    |
| hsa-miR-19a     | 1446.2   | 800.6    | 1727.6   |
| hsa-miR-19b     | 2821.5   | 1861.4   | 3416.2   |
| hsa-miR-20a     | 36472.8  | 32233.8  | 31279.5  |
| hsa-miR-20b     | 133.9    | 172.1    | 133.2    |
| hsa-miR-21      | 166040.9 | 144170.0 | 156325.4 |
| hsa-miR-210     | 1592.3   | 1537.2   | 2448.5   |
| hsa-miR-22      | 256.1    | 188.7    | 308.0    |
| hsa-miR-221     | 1869.8   | 1626.7   | 2862.3   |
| hsa-miR-221*    | 121.5    | 121.6    | 202.9    |
| hsa-miR-222     | 5157.1   | 849.3    | 3608.2   |
| hsa-miR-223     | 3610.9   | 4018.9   | 4473.1   |
| hsa-miR-223*    | 215.4    | 16.3     | 266.4    |
| hsa-miR-23a     | 3110.6   | 2841.7   | 2408.5   |
| hsa-miR-23b     | 195.1    | 165.2    | 169.4    |
| hsa-miR-24      | 20689.6  | 19378.0  | 31405.0  |
| hsa-miR-24-2*   | 136.1    | 118.7    | 601.1    |
| hsa-miR-25      | 379.3    | 450.9    | 379.6    |
| hsa-miR-26a     | 1418.7   | 888.6    | 1276.2   |
| hsa-miR-26b     | 1519.4   | 1100.2   | 1412.8   |
| hsa-miR-27a     | 16881.9  | 8505.5   | 14212.2  |
| hsa-miR-27a*    | 36.4     | 93.0     | 89.1     |
| hsa-miR-27b     | 1945.6   | 1665.7   | 1227.6   |
| hsa-miR-28-5p   | 303.0    | 289.4    | 377.7    |
| hsa-miR-28-3p   | 546.3    | 603.3    | 671.8    |
| hsa-miR-29a     | 1476.3   | 1006.3   | 2505.8   |
| hsa-miR-29b     | 651.3    | 248.2    | 738.5    |
| hsa-miR-301a    | 77.1     | 180.9    | 99.9     |
| hsa-miR-30a     | 170.0    | 170.8    | 139.9    |
| hsa-miR-30b     | 559.3    | 454.6    | 380.5    |
| hsa-miR-30c     | 49856.6  | 33876.5  | 33601.2  |
| hsa-miR-30d     | 16286.2  | 23503.8  | 15734.7  |
| hsa-miR-30e     | 152182.4 | 162668.6 | 144536.8 |
| hsa-miR-32      | 540.0    | 591.5    | 434.6    |
| hsa-miR-320a    | 943.8    | 1967.0   | 1110.5   |
| hsa-miR-338-3p  | 173.8    | 115.5    | 138.3    |

|                |         |         |         |
|----------------|---------|---------|---------|
| hsa-miR-339-3p | 452.2   | 1075.0  | 708.5   |
| hsa-miR-339-5p | 311.8   | 164.6   | 359.5   |
| hsa-miR-33a    | 424.0   | 622.9   | 813.0   |
| hsa-miR-340    | 212.1   | 172.0   | 143.1   |
| hsa-miR-342-3p | 4222.8  | 4698.6  | 10903.8 |
| hsa-miR-342-5p | 235.7   | 171.5   | 216.5   |
| hsa-miR-345    | 255.0   | 216.7   | 339.7   |
| hsa-miR-34c-5p | 963.3   | 929.2   | 1017.4  |
| hsa-miR-361-5p | 384.4   | 364.3   | 468.5   |
| hsa-miR-363    | 153.2   | 155.4   | 162.3   |
| hsa-miR-374a*  | 337.5   | 410.1   | 571.1   |
| hsa-miR-374a   | 222.7   | 172.1   | 215.3   |
| hsa-miR-374b   | 255.0   | 138.2   | 146.5   |
| hsa-miR-378    | 2869.3  | 2602.7  | 3555.2  |
| hsa-miR-423-5p | 1530.1  | 974.0   | 1335.4  |
| hsa-miR-423-3p | 5185.0  | 4491.5  | 3996.2  |
| hsa-miR-424    | 88.8    | 78.0    | 94.3    |
| hsa-miR-425    | 15347.1 | 18135.8 | 17868.1 |
| hsa-miR-425*   | 381.5   | 307.9   | 702.7   |
| hsa-miR-484    | 113.6   | 67.7    | 134.0   |
| hsa-miR-532-5p | 240.0   | 309.3   | 421.2   |
| hsa-miR-532-3p | 32.1    | 35.8    | 25.0    |
| hsa-miR-589    | 53.6    | 60.6    | 51.6    |
| hsa-miR-590-5p | 150.0   | 116.6   | 144.9   |
| hsa-miR-590-3p | 132.9   | 110.7   | 154.0   |
| hsa-miR-598    | 229.3   | 486.7   | 233.8   |
| hsa-miR-628-5p | 99.6    | 43.2    | 114.9   |
| hsa-miR-652    | 363.2   | 289.8   | 235.6   |
| hsa-miR-671-5p | 43.9    | 29.8    | 54.9    |
| hsa-miR-744    | 437.1   | 212.2   | 253.9   |
| hsa-miR-769-5p | 166.0   | 226.2   | 213.1   |
| hsa-miR-886-5p | 90.3    | 118.5   | 130.5   |
| hsa-miR-9      | 3302.0  | 4411.0  | 3492.5  |
| hsa-miR-9-3*   | 96.0    | 78.6    | 89.4    |
| hsa-miR-92a    | 17580.1 | 25516.4 | 18717.3 |
| hsa-miR-92b    | 188.6   | 159.3   | 251.4   |
| hsa-miR-93     | 4780.0  | 13381.2 | 4753.0  |
| hsa-miR-96     | 827.2   | 677.3   | 672.7   |
| hsa-miR-98     | 1023.0  | 926.3   | 837.2   |
| hsa-miR-99b    | 2045.5  | 2800.7  | 1667.6  |

Supplementary Table S3. Fold change in abundance for tags mapping to miRNA loci associating with AGO proteins relative to sequenced tags in the complete cell.

\*\*minimum 100tpm in at least one condition

(A) complete cell vs. AGO1

| miRNA loci      | direction of fold change | complete cell normalized counts | AGO1-associating normalized counts | fold change |
|-----------------|--------------------------|---------------------------------|------------------------------------|-------------|
| hsa-let-7a      | -                        | 161941.2                        | 96507.1                            | 1.7         |
| hsa-let-7b      | -                        | 97778.7                         | 23367.7                            | 4.2         |
| hsa-let-7d      | -                        | 2839.8                          | 1437.8                             | 2.0         |
| hsa-let-7d*     | -                        | 103.1                           | 87.8                               | 1.2         |
| hsa-let-7e      | -                        | 719.5                           | 234.7                              | 3.1         |
| hsa-let-7f      | -                        | 62332.0                         | 57184.6                            | 1.1         |
| hsa-let-7g      | -                        | 20324.3                         | 11953.6                            | 1.7         |
| hsa-let-7i      | -                        | 5394.1                          | 4889.1                             | 1.1         |
| hsa-miR-101     | -                        | 3556.2                          | 3207.2                             | 1.1         |
| hsa-miR-103     | +                        | 10468.1                         | 13160.6                            | 1.3         |
| hsa-miR-106b    | +                        | 2116.0                          | 2509.4                             | 1.2         |
| hsa-miR-10a     | +                        | 42.0                            | 111.4                              | 2.7         |
| hsa-miR-125a-5p | +                        | 499.4                           | 1712.2                             | 3.4         |
| hsa-miR-126     | +                        | 1710.3                          | 2572.7                             | 1.5         |
| hsa-miR-126*    | +                        | 589.8                           | 814.3                              | 1.4         |
| hsa-miR-1274b   | -                        | 246.9                           | 26.5                               | 9.3         |
| hsa-miR-128     | -                        | 146.6                           | 99.6                               | 1.5         |
| hsa-miR-1307    | -                        | 446.0                           | 172.5                              | 2.6         |
| hsa-miR-1307*   | +                        | 152.3                           | 1378.0                             | 9.0         |
| hsa-miR-130b    | -                        | 1231.7                          | 185.3                              | 6.6         |
| hsa-miR-130b*   | +                        | 40.9                            | 109.8                              | 2.7         |
| hsa-miR-140-3p  | -                        | 2903.0                          | 2534.1                             | 1.1         |
| hsa-miR-140-5p  | -                        | 1093.7                          | 985.8                              | 1.1         |
| hsa-miR-142-3p  | +                        | 85046.9                         | 129620.5                           | 1.5         |
| hsa-miR-142-5p  | -                        | 5309.0                          | 1797.9                             | 3.0         |
| hsa-miR-143     | -                        | 335.5                           | 311.7                              | 1.1         |
| hsa-miR-146a    | -                        | 140.9                           | 139.3                              | 1.0         |
| hsa-miR-146b-5p | -                        | 12774.7                         | 5699.3                             | 2.2         |
| hsa-miR-148a    | +                        | 6650.3                          | 9058.4                             | 1.4         |
| hsa-miR-148b    | +                        | 1711.6                          | 2087.3                             | 1.2         |
| hsa-miR-148b*   | -                        | 143.0                           | 60.0                               | 2.4         |
| hsa-miR-151-3p  | +                        | 417.0                           | 457.2                              | 1.1         |
| hsa-miR-152     | -                        | 1644.7                          | 1531.2                             | 1.1         |
| hsa-miR-155     | -                        | 10185.0                         | 9027.4                             | 1.1         |
| hsa-miR-15a     | +                        | 1683.3                          | 2315.1                             | 1.4         |
| hsa-miR-15b     | -                        | 820.9                           | 512.7                              | 1.6         |
| hsa-miR-15b*    | -                        | 105.9                           | 32.1                               | 3.3         |
| hsa-miR-16      | -                        | 10592.6                         | 6481.4                             | 1.6         |
| hsa-miR-17      | -                        | 12523.8                         | 9273.1                             | 1.4         |
| hsa-miR-17*     | -                        | 502.6                           | 493.9                              | 1.0         |
| hsa-miR-181a*   | -                        | 185.7                           | 168.2                              | 1.1         |
| hsa-miR-181b    | +                        | 366.5                           | 442.4                              | 1.2         |

|                 |   |          |          |     |
|-----------------|---|----------|----------|-----|
| hsa-miR-182     | - | 209.8    | 48.2     | 4.4 |
| hsa-miR-183     | + | 1461.7   | 1762.3   | 1.2 |
| hsa-miR-185     | - | 2044.3   | 1799.0   | 1.1 |
| hsa-miR-186     | + | 3096.4   | 6700.1   | 2.2 |
| hsa-miR-18a     | + | 1835.8   | 2308.0   | 1.3 |
| hsa-miR-191     | + | 8949.6   | 17961.6  | 2.0 |
| hsa-miR-192     | - | 156.0    | 125.3    | 1.2 |
| hsa-miR-193a-5p | + | 68.8     | 163.9    | 2.4 |
| hsa-miR-196b    | - | 3638.2   | 3385.3   | 1.1 |
| hsa-miR-197     | + | 470.0    | 706.1    | 1.5 |
| hsa-miR-199a-3p | - | 198.3    | 152.2    | 1.3 |
| hsa-miR-199b-5p | + | 74.1     | 106.1    | 1.4 |
| hsa-miR-19a     | - | 1676.8   | 1446.2   | 1.2 |
| hsa-miR-19b     | - | 3501.1   | 2821.5   | 1.2 |
| hsa-miR-200c    | + | 47.2     | 113.6    | 2.4 |
| hsa-miR-20a     | + | 28358.3  | 36472.8  | 1.3 |
| hsa-miR-20b     | + | 112.8    | 133.9    | 1.2 |
| hsa-miR-21      | + | 78358.7  | 166040.9 | 2.1 |
| hsa-miR-210     | - | 3315.2   | 1592.3   | 2.1 |
| hsa-miR-22      | + | 169.4    | 256.1    | 1.5 |
| hsa-miR-221     | - | 1931.9   | 1869.8   | 1.0 |
| hsa-miR-221*    | - | 201.3    | 121.5    | 1.7 |
| hsa-miR-222     | + | 1751.9   | 5157.1   | 2.9 |
| hsa-miR-223     | + | 3254.0   | 3610.9   | 1.1 |
| hsa-miR-223*    | + | 169.4    | 215.4    | 1.3 |
| hsa-miR-23a     | + | 2638.5   | 3110.6   | 1.2 |
| hsa-miR-23b     | + | 180.0    | 195.1    | 1.1 |
| hsa-miR-24      | - | 32400.6  | 20689.6  | 1.6 |
| hsa-miR-24-2*   | + | 120.6    | 136.1    | 1.1 |
| hsa-miR-25      | - | 754.8    | 379.3    | 2.0 |
| hsa-miR-26a     | - | 2681.0   | 1418.7   | 1.9 |
| hsa-miR-26b     | - | 2462.6   | 1519.4   | 1.6 |
| hsa-miR-27a     | + | 5800.7   | 16881.9  | 2.9 |
| hsa-miR-27a*    | - | 174.7    | 36.4     | 4.8 |
| hsa-miR-27b     | + | 923.3    | 1945.6   | 2.1 |
| hsa-miR-28-5p   | - | 442.2    | 303.0    | 1.5 |
| hsa-miR-28-3p   | + | 464.7    | 546.3    | 1.2 |
| hsa-miR-29a     | + | 1212.0   | 1476.3   | 1.2 |
| hsa-miR-29b     | + | 545.4    | 651.3    | 1.2 |
| hsa-miR-301a    | - | 205.7    | 77.1     | 2.7 |
| hsa-miR-30a     | + | 102.6    | 170.0    | 1.7 |
| hsa-miR-30b     | - | 1818.3   | 559.3    | 3.3 |
| hsa-miR-30c     | + | 39624.4  | 49856.6  | 1.3 |
| hsa-miR-30d     | + | 11636.3  | 16286.2  | 1.4 |
| hsa-miR-30e     | - | 159026.9 | 152182.4 | 1.0 |
| hsa-miR-32      | - | 710.7    | 540.0    | 1.3 |
| hsa-miR-320a    | - | 1959.1   | 943.8    | 2.1 |
| hsa-miR-338-3p  | + | 112.2    | 173.8    | 1.5 |
| hsa-miR-339-3p  | - | 578.4    | 452.2    | 1.3 |
| hsa-miR-339-5p  | + | 284.0    | 311.8    | 1.1 |

|                |   |         |         |     |
|----------------|---|---------|---------|-----|
| hsa-miR-33a    | - | 608.4   | 424.0   | 1.4 |
| hsa-miR-340    | - | 261.9   | 212.1   | 1.2 |
| hsa-miR-342-3p | + | 2541.3  | 4222.8  | 1.7 |
| hsa-miR-342-5p | - | 359.2   | 235.7   | 1.5 |
| hsa-miR-345    | - | 313.6   | 255.0   | 1.2 |
| hsa-miR-34c-5p | - | 2014.6  | 963.3   | 2.1 |
| hsa-miR-361-5p | + | 374.3   | 384.4   | 1.0 |
| hsa-miR-363    | + | 78.6    | 153.2   | 1.9 |
| hsa-miR-374a*  | - | 406.1   | 337.5   | 1.2 |
| hsa-miR-374a   | + | 161.7   | 222.7   | 1.4 |
| hsa-miR-374b   | - | 318.9   | 255.0   | 1.3 |
| hsa-miR-378    | - | 3793.1  | 2869.3  | 1.3 |
| hsa-miR-423-5p | - | 3967.7  | 1530.1  | 2.6 |
| hsa-miR-423-3p | + | 3133.5  | 5185.0  | 1.7 |
| hsa-miR-424    | - | 343.6   | 88.8    | 3.9 |
| hsa-miR-425    | + | 7601.8  | 15347.1 | 2.0 |
| hsa-miR-425*   | + | 286.8   | 381.5   | 1.3 |
| hsa-miR-454    | + | 86.4    | 175.7   | 2.0 |
| hsa-miR-484    | - | 244.4   | 113.6   | 2.2 |
| hsa-miR-532-5p | - | 347.4   | 240.0   | 1.4 |
| hsa-miR-532-3p | - | 127.9   | 32.1    | 4.0 |
| hsa-miR-589    | - | 136.0   | 53.6    | 2.5 |
| hsa-miR-590-5p | + | 144.2   | 150.0   | 1.0 |
| hsa-miR-590-3p | + | 86.4    | 132.9   | 1.5 |
| hsa-miR-598    | + | 130.3   | 229.3   | 1.8 |
| hsa-miR-627    | + | 97.3    | 109.3   | 1.1 |
| hsa-miR-628-5p | - | 124.6   | 99.6    | 1.3 |
| hsa-miR-652    | - | 411.4   | 363.2   | 1.1 |
| hsa-miR-660    | + | 36.3    | 130.7   | 3.6 |
| hsa-miR-671-5p | - | 127.9   | 43.9    | 2.9 |
| hsa-miR-744    | + | 426.5   | 437.1   | 1.0 |
| hsa-miR-769-5p | - | 244.0   | 166.0   | 1.5 |
| hsa-miR-886-5p | - | 128.7   | 90.3    | 1.4 |
| hsa-miR-9      | - | 4193.8  | 3302.0  | 1.3 |
| hsa-miR-92a    | + | 14252.1 | 17580.1 | 1.2 |
| hsa-miR-92b    | - | 207.7   | 188.6   | 1.1 |
| hsa-miR-93     | - | 5091.1  | 4780.0  | 1.1 |
| hsa-miR-9-3*   | - | 113.5   | 96.0    | 1.2 |
| hsa-miR-95     | + | 91.6    | 117.9   | 1.3 |
| hsa-miR-96     | + | 685.9   | 827.2   | 1.2 |
| hsa-miR-98     | + | 845.4   | 1023.0  | 1.2 |
| hsa-miR-99b    | + | 564.5   | 2045.5  | 3.6 |

(B) complete cell vs. AGO2

| miRNA loci | direction of fold change | complete cell normalized counts | AGO2-associating normalized counts | fold change |
|------------|--------------------------|---------------------------------|------------------------------------|-------------|
| hsa-let-7a | -                        | 161941.2                        | 98652.0                            | 1.6         |
| hsa-let-7b | -                        | 97778.7                         | 38847.3                            | 2.5         |
| hsa-let-7d | -                        | 2839.8                          | 1249.3                             | 2.3         |

|                 |   |         |          |      |
|-----------------|---|---------|----------|------|
| hsa-let-7d*     | - | 103.1   | 41.6     | 2.5  |
| hsa-let-7e      | - | 719.5   | 290.6    | 2.5  |
| hsa-let-7f      | - | 62332.0 | 60343.4  | 1.0  |
| hsa-let-7g      | - | 20324.3 | 12076.7  | 1.7  |
| hsa-let-7i      | - | 5394.1  | 2854.9   | 1.9  |
| hsa-miR-101     | - | 3556.2  | 3457.6   | 1.0  |
| hsa-miR-103     | + | 10468.1 | 10479.8  | 1.0  |
| hsa-miR-106b    | - | 2116.0  | 1581.0   | 1.3  |
| hsa-miR-106b*   | + | 97.3    | 134.5    | 1.4  |
| hsa-miR-10a     | + | 42.0    | 251.6    | 6.0  |
| hsa-miR-125a-5p | + | 499.4   | 2664.0   | 5.3  |
| hsa-miR-126     | + | 1710.3  | 2398.2   | 1.4  |
| hsa-miR-126*    | - | 589.8   | 490.4    | 1.2  |
| hsa-miR-1274b   | - | 246.9   | 3.6      | 68.8 |
| hsa-miR-128     | - | 146.6   | 38.1     | 3.9  |
| hsa-miR-1307    | - | 446.0   | 417.4    | 1.1  |
| hsa-miR-1307*   | + | 152.3   | 519.1    | 3.4  |
| hsa-miR-130b    | - | 1231.7  | 507.4    | 2.4  |
| hsa-miR-140-3p  | + | 2903.0  | 6987.5   | 2.4  |
| hsa-miR-140-5p  | - | 1093.7  | 656.4    | 1.7  |
| hsa-miR-142-3p  | + | 85046.9 | 128978.3 | 1.5  |
| hsa-miR-142-5p  | - | 5309.0  | 651.8    | 8.1  |
| hsa-miR-143     | + | 335.5   | 496.1    | 1.5  |
| hsa-miR-146a    | + | 140.9   | 226.4    | 1.6  |
| hsa-miR-146b-5p | + | 12774.7 | 14394.2  | 1.1  |
| hsa-miR-148a    | + | 6650.3  | 8522.1   | 1.3  |
| hsa-miR-148b    | - | 1711.6  | 1596.7   | 1.1  |
| hsa-miR-148b*   | - | 143.0   | 140.3    | 1.0  |
| hsa-miR-151-3p  | + | 417.0   | 584.2    | 1.4  |
| hsa-miR-152     | - | 1644.7  | 1586.3   | 1.0  |
| hsa-miR-155     | - | 10185.0 | 8018.6   | 1.3  |
| hsa-miR-15a     | - | 1683.3  | 1230.3   | 1.4  |
| hsa-miR-15b     | - | 820.9   | 296.4    | 2.8  |
| hsa-miR-15b*    | - | 105.9   | 16.3     | 6.5  |
| hsa-miR-16      | - | 10592.6 | 6424.4   | 1.6  |
| hsa-miR-17      | + | 12523.8 | 12802.2  | 1.0  |
| hsa-miR-17*     | + | 502.6   | 751.9    | 1.5  |
| hsa-miR-181a*   | - | 185.7   | 121.7    | 1.5  |
| hsa-miR-181b    | + | 366.5   | 624.9    | 1.7  |
| hsa-miR-182     | + | 209.8   | 981.5    | 4.7  |
| hsa-miR-183     | + | 1461.7  | 2592.5   | 1.8  |
| hsa-miR-185     | - | 2044.3  | 1565.9   | 1.3  |
| hsa-miR-186     | + | 3096.4  | 7817.0   | 2.5  |
| hsa-miR-18a     | + | 1835.8  | 2299.2   | 1.3  |
| hsa-miR-191     | + | 8949.6  | 9304.6   | 1.0  |
| hsa-miR-192     | - | 156.0   | 144.4    | 1.1  |
| hsa-miR-193a-5p | + | 68.8    | 146.7    | 2.1  |
| hsa-miR-194     | + | 70.9    | 102.9    | 1.5  |
| hsa-miR-196b    | + | 3638.2  | 3812.1   | 1.0  |
| hsa-miR-197     | - | 470.0   | 351.3    | 1.3  |

|                 |   |          |          |      |
|-----------------|---|----------|----------|------|
| hsa-miR-199a-3p | - | 198.3    | 125.8    | 1.6  |
| hsa-miR-19a     | - | 1676.8   | 800.6    | 2.1  |
| hsa-miR-19b     | - | 3501.1   | 1861.4   | 1.9  |
| hsa-miR-20a     | + | 28358.3  | 32233.8  | 1.1  |
| hsa-miR-20b     | + | 112.8    | 172.1    | 1.5  |
| hsa-miR-21      | + | 78358.7  | 144170.0 | 1.8  |
| hsa-miR-210     | - | 3315.2   | 1537.2   | 2.2  |
| hsa-miR-22      | + | 169.4    | 188.7    | 1.1  |
| hsa-miR-221     | - | 1931.9   | 1626.7   | 1.2  |
| hsa-miR-221*    | - | 201.3    | 121.6    | 1.7  |
| hsa-miR-222     | - | 1751.9   | 849.3    | 2.1  |
| hsa-miR-223     | + | 3254.0   | 4018.9   | 1.2  |
| hsa-miR-223*    | - | 169.4    | 16.3     | 10.4 |
| hsa-miR-23a     | + | 2638.5   | 2841.7   | 1.1  |
| hsa-miR-23b     | - | 180.0    | 165.2    | 1.1  |
| hsa-miR-24      | - | 32400.6  | 19378.0  | 1.7  |
| hsa-miR-24*     | - | 120.6    | 118.7    | 1.0  |
| hsa-miR-25      | - | 754.8    | 450.9    | 1.7  |
| hsa-miR-26a     | - | 2681.0   | 888.6    | 3.0  |
| hsa-miR-26b     | - | 2462.6   | 1100.2   | 2.2  |
| hsa-miR-27a     | + | 5800.7   | 8505.5   | 1.5  |
| hsa-miR-27a*    | - | 174.7    | 93.0     | 1.9  |
| hsa-miR-27b     | + | 923.3    | 1665.7   | 1.8  |
| hsa-miR-28-5p   | - | 442.2    | 289.4    | 1.5  |
| hsa-miR-28-3p   | + | 464.7    | 603.3    | 1.3  |
| hsa-miR-29a     | - | 1212.0   | 1006.3   | 1.2  |
| hsa-miR-29b     | - | 545.4    | 248.2    | 2.2  |
| hsa-miR-301a    | - | 205.7    | 180.9    | 1.1  |
| hsa-miR-30a     | + | 102.6    | 170.8    | 1.7  |
| hsa-miR-30b     | - | 1818.3   | 454.6    | 4.0  |
| hsa-miR-30c     | - | 39624.4  | 33876.5  | 1.2  |
| hsa-miR-30d     | + | 11636.3  | 23503.8  | 2.0  |
| hsa-miR-30e     | + | 159026.9 | 162668.6 | 1.0  |
| hsa-miR-32      | - | 710.7    | 591.5    | 1.2  |
| hsa-miR-320a    | + | 1959.1   | 1967.0   | 1.0  |
| hsa-miR-338-3p  | + | 112.2    | 115.5    | 1.0  |
| hsa-miR-339-3p  | + | 578.4    | 1075.0   | 1.9  |
| hsa-miR-339-5p  | - | 284.0    | 164.6    | 1.7  |
| hsa-miR-33a     | + | 608.4    | 622.9    | 1.0  |
| hsa-miR-340     | - | 261.9    | 172.0    | 1.5  |
| hsa-miR-342-3p  | + | 2541.3   | 4698.6   | 1.8  |
| hsa-miR-342-5p  | - | 359.2    | 171.5    | 2.1  |
| hsa-miR-345     | - | 313.6    | 216.7    | 1.4  |
| hsa-miR-34c-5p  | - | 2014.6   | 929.2    | 2.2  |
| hsa-miR-361-5p  | - | 374.3    | 364.3    | 1.0  |
| hsa-miR-362-5p  | + | 26.9     | 103.8    | 3.9  |
| hsa-miR-363     | + | 78.6     | 155.4    | 2.0  |
| hsa-miR-374a*   | + | 406.1    | 410.1    | 1.0  |
| hsa-miR-374a    | + | 161.7    | 172.1    | 1.1  |
| hsa-miR-374b    | - | 318.9    | 138.2    | 2.3  |



|                |   |         |         |     |
|----------------|---|---------|---------|-----|
| hsa-miR-378    | - | 3793.1  | 2602.7  | 1.5 |
| hsa-miR-423-5p | - | 3967.7  | 974.0   | 4.1 |
| hsa-miR-423-3p | + | 3133.5  | 4491.5  | 1.4 |
| hsa-miR-424    | - | 343.6   | 78.0    | 4.4 |
| hsa-miR-425    | + | 7601.8  | 18135.8 | 2.4 |
| hsa-miR-425*   | + | 286.8   | 307.9   | 1.1 |
| hsa-miR-454    | + | 86.4    | 121.2   | 1.4 |
| hsa-miR-484    | - | 244.4   | 67.7    | 3.6 |
| hsa-miR-532-5p | - | 347.4   | 309.3   | 1.1 |
| hsa-miR-532-3p | - | 127.9   | 35.8    | 3.6 |
| hsa-miR-577    | + | 67.2    | 149.9   | 2.2 |
| hsa-miR-589    | - | 136.0   | 60.6    | 2.2 |
| hsa-miR-590-5p | - | 144.2   | 116.6   | 1.2 |
| hsa-miR-590-3p | + | 86.4    | 110.7   | 1.3 |
| hsa-miR-598    | + | 130.3   | 486.7   | 3.7 |
| hsa-miR-628-5p | - | 124.6   | 43.2    | 2.9 |
| hsa-miR-652    | - | 411.4   | 289.8   | 1.4 |
| hsa-miR-671-5p | - | 127.9   | 29.8    | 4.3 |
| hsa-miR-744    | - | 426.5   | 212.2   | 2.0 |
| hsa-miR-769-5p | - | 244.0   | 226.2   | 1.1 |
| hsa-miR-886-5p | - | 128.7   | 118.5   | 1.1 |
| hsa-miR-9      | + | 4193.8  | 4411.0  | 1.1 |
| hsa-miR-92a    | + | 14252.1 | 25516.4 | 1.8 |
| hsa-miR-92b    | - | 207.7   | 159.3   | 1.3 |
| hsa-miR-93     | + | 5091.1  | 13381.2 | 2.6 |
| hsa-miR-9-3*   | - | 113.5   | 78.6    | 1.4 |
| hsa-miR-95     | + | 91.6    | 125.4   | 1.4 |
| hsa-miR-96     | - | 685.9   | 677.3   | 1.0 |
| hsa-miR-98     | + | 845.4   | 926.3   | 1.1 |
| hsa-miR-99b    | + | 564.5   | 2800.7  | 5.0 |

(C) complete cell vs. AGO3

| miRNA loci      | direction of fold change | complete cell normalized counts | AGO3-associating normalized counts | fold change |
|-----------------|--------------------------|---------------------------------|------------------------------------|-------------|
| hsa-let-7a      | -                        | 161941.2                        | 102478.8                           | 1.6         |
| hsa-let-7b      | -                        | 97778.7                         | 36273.1                            | 2.7         |
| hsa-let-7d      | -                        | 2839.8                          | 1633.7                             | 1.7         |
| hsa-let-7d*     | +                        | 103.1                           | 114.8                              | 1.1         |
| hsa-let-7e      | -                        | 719.5                           | 424.8                              | 1.7         |
| hsa-let-7f      | -                        | 62332.0                         | 56246.6                            | 1.1         |
| hsa-let-7g      | -                        | 20324.3                         | 18551.3                            | 1.1         |
| hsa-let-7i      | -                        | 5394.1                          | 3587.1                             | 1.5         |
| hsa-miR-101     | +                        | 3556.2                          | 3577.4                             | 1.0         |
| hsa-miR-103     | -                        | 10468.1                         | 9829.1                             | 1.1         |
| hsa-miR-106b    | +                        | 2116.0                          | 2545.1                             | 1.2         |
| hsa-miR-106b*   | +                        | 97.3                            | 128.2                              | 1.3         |
| hsa-miR-10a     | +                        | 42.0                            | 136.5                              | 3.3         |
| hsa-miR-125a-5p | +                        | 499.4                           | 2108.7                             | 4.2         |
| hsa-miR-126     | +                        | 1710.3                          | 2770.7                             | 1.6         |

|                 |   |         |          |     |
|-----------------|---|---------|----------|-----|
| hsa-miR-126*    | + | 589.8   | 1295.4   | 2.2 |
| hsa-miR-1274b   | - | 246.9   | 82.9     | 3.0 |
| hsa-miR-128     | - | 146.6   | 63.3     | 2.3 |
| hsa-miR-1307    | + | 446.0   | 760.9    | 1.7 |
| hsa-miR-1307*   | + | 152.3   | 934.1    | 6.1 |
| hsa-miR-130b    | - | 1231.7  | 185.6    | 6.6 |
| hsa-miR-140-3p  | + | 2903.0  | 3879.7   | 1.3 |
| hsa-miR-140-5p  | + | 1093.7  | 1785.8   | 1.6 |
| hsa-miR-142-3p  | + | 85046.9 | 113941.4 | 1.3 |
| hsa-miR-142-5p  | - | 5309.0  | 2388.5   | 2.2 |
| hsa-miR-143     | + | 335.5   | 372.1    | 1.1 |
| hsa-miR-146a    | + | 140.9   | 191.4    | 1.4 |
| hsa-miR-146b-5p | - | 12774.7 | 7035.8   | 1.8 |
| hsa-miR-148a    | - | 6650.3  | 5780.3   | 1.2 |
| hsa-miR-148b    | - | 1711.6  | 1407.8   | 1.2 |
| hsa-miR-148b*   | - | 143.0   | 132.4    | 1.1 |
| hsa-miR-151-3p  | + | 417.0   | 506.2    | 1.2 |
| hsa-miR-152     | - | 1644.7  | 1103.9   | 1.5 |
| hsa-miR-155     | - | 10185.0 | 10096.3  | 1.0 |
| hsa-miR-15a     | - | 1683.3  | 1053.6   | 1.6 |
| hsa-miR-15b     | - | 820.9   | 298.3    | 2.8 |
| hsa-miR-15b*    | - | 105.9   | 39.1     | 2.7 |
| hsa-miR-16      | - | 10592.6 | 5195.8   | 2.0 |
| hsa-miR-17      | - | 12523.8 | 9423.0   | 1.3 |
| hsa-miR-17*     | + | 502.6   | 1326.2   | 2.6 |
| hsa-miR-181a*   | + | 185.7   | 253.1    | 1.4 |
| hsa-miR-181b    | - | 366.5   | 217.2    | 1.7 |
| hsa-miR-182     | - | 209.8   | 100.7    | 2.1 |
| hsa-miR-183     | + | 1461.7  | 1539.9   | 1.1 |
| hsa-miR-185     | + | 2044.3  | 2324.3   | 1.1 |
| hsa-miR-186     | + | 3096.4  | 17184.6  | 5.5 |
| hsa-miR-18a     | + | 1835.8  | 2185.4   | 1.2 |
| hsa-miR-191     | + | 8949.6  | 18964.5  | 2.1 |
| hsa-miR-192     | + | 156.0   | 202.2    | 1.3 |
| hsa-miR-193a-5p | + | 68.8    | 452.1    | 6.6 |
| hsa-miR-194     | + | 70.9    | 104.9    | 1.5 |
| hsa-miR-196b    | - | 3638.2  | 3056.7   | 1.2 |
| hsa-miR-197     | + | 470.0   | 585.3    | 1.2 |
| hsa-miR-199a-3p | + | 198.3   | 202.6    | 1.0 |
| hsa-miR-199b-5p | + | 74.1    | 193.1    | 2.6 |
| hsa-miR-199b-3p | + | 69.3    | 101.3    | 1.5 |
| hsa-miR-19a     | + | 1676.8  | 1727.6   | 1.0 |
| hsa-miR-19b     | - | 3501.1  | 3416.2   | 1.0 |
| hsa-miR-200c    | + | 47.2    | 141.5    | 3.0 |
| hsa-miR-20a     | + | 28358.3 | 31279.5  | 1.1 |
| hsa-miR-20b     | + | 112.8   | 133.2    | 1.2 |
| hsa-miR-21      | + | 78358.7 | 156325.4 | 2.0 |
| hsa-miR-21*     | + | 38.3    | 134.9    | 3.5 |
| hsa-miR-210     | - | 3315.2  | 2448.5   | 1.4 |
| hsa-miR-22      | + | 169.4   | 308.0    | 1.8 |

|                |   |          |          |     |
|----------------|---|----------|----------|-----|
| hsa-miR-221    | + | 1931.9   | 2862.3   | 1.5 |
| hsa-miR-221*   | + | 201.3    | 202.9    | 1.0 |
| hsa-miR-222    | + | 1751.9   | 3608.2   | 2.1 |
| hsa-miR-222*   | + | 90.8     | 186.5    | 2.1 |
| hsa-miR-223    | + | 3254.0   | 4473.1   | 1.4 |
| hsa-miR-223*   | + | 169.4    | 266.4    | 1.6 |
| hsa-miR-23a    | - | 2638.5   | 2408.5   | 1.1 |
| hsa-miR-23b    | - | 180.0    | 169.4    | 1.1 |
| hsa-miR-24     | - | 32400.6  | 31405.0  | 1.0 |
| hsa-miR-24-2*  | + | 120.6    | 601.1    | 5.0 |
| hsa-miR-25     | - | 754.8    | 379.6    | 2.0 |
| hsa-miR-26a    | - | 2681.0   | 1276.2   | 2.1 |
| hsa-miR-26b    | - | 2462.6   | 1412.8   | 1.7 |
| hsa-miR-27a    | + | 5800.7   | 14212.2  | 2.5 |
| hsa-miR-27a*   | - | 174.7    | 89.1     | 2.0 |
| hsa-miR-27b    | + | 923.3    | 1227.6   | 1.3 |
| hsa-miR-28-5p  | - | 442.2    | 377.7    | 1.2 |
| hsa-miR-28-3p  | + | 464.7    | 671.8    | 1.4 |
| hsa-miR-29a    | + | 1212.0   | 2505.8   | 2.1 |
| hsa-miR-29a*   | + | 39.9     | 161.5    | 4.0 |
| hsa-miR-29b    | + | 545.4    | 738.5    | 1.4 |
| hsa-miR-301a   | - | 205.7    | 99.9     | 2.1 |
| hsa-miR-30a    | + | 102.6    | 139.9    | 1.4 |
| hsa-miR-30b    | - | 1818.3   | 380.5    | 4.8 |
| hsa-miR-30c    | - | 39624.4  | 33601.2  | 1.2 |
| hsa-miR-30d    | + | 11636.3  | 15734.7  | 1.4 |
| hsa-miR-30e    | - | 159026.9 | 144536.8 | 1.1 |
| hsa-miR-30e*   | + | 41.1     | 168.2    | 4.1 |
| hsa-miR-32     | - | 710.7    | 434.6    | 1.6 |
| hsa-miR-320a   | - | 1959.1   | 1110.5   | 1.8 |
| hsa-miR-338-3p | + | 112.2    | 138.3    | 1.2 |
| hsa-miR-339-3p | + | 578.4    | 708.5    | 1.2 |
| hsa-miR-339-5p | + | 284.0    | 359.5    | 1.3 |
| hsa-miR-33a    | + | 608.4    | 813.0    | 1.3 |
| hsa-miR-340    | - | 261.9    | 143.1    | 1.8 |
| hsa-miR-342-3p | + | 2541.3   | 10903.8  | 4.3 |
| hsa-miR-342-5p | - | 359.2    | 216.5    | 1.7 |
| hsa-miR-345    | + | 313.6    | 339.7    | 1.1 |
| hsa-miR-34c-5p | - | 2014.6   | 1017.4   | 2.0 |
| hsa-miR-361-5p | + | 374.3    | 468.5    | 1.3 |
| hsa-miR-363    | + | 78.6     | 162.3    | 2.1 |
| hsa-miR-374a*  | + | 406.1    | 571.1    | 1.4 |
| hsa-miR-374a   | + | 161.7    | 215.3    | 1.3 |
| hsa-miR-374b   | - | 318.9    | 146.5    | 2.2 |
| hsa-miR-378    | - | 3793.1   | 3555.2   | 1.1 |
| hsa-miR-423-5p | - | 3967.7   | 1335.4   | 3.0 |
| hsa-miR-423-3p | + | 3133.5   | 3996.2   | 1.3 |
| hsa-miR-424    | - | 343.6    | 94.3     | 3.6 |
| hsa-miR-425    | + | 7601.8   | 17868.1  | 2.4 |
| hsa-miR-425*   | + | 286.8    | 702.7    | 2.5 |

|                |   |         |         |     |
|----------------|---|---------|---------|-----|
| hsa-miR-455-3p | + | 69.2    | 114.8   | 1.7 |
| hsa-miR-484    | - | 244.4   | 134.0   | 1.8 |
| hsa-miR-532-5p | + | 347.4   | 421.2   | 1.2 |
| hsa-miR-532-3p | - | 127.9   | 25.0    | 5.1 |
| hsa-miR-577    | + | 67.2    | 149.0   | 2.2 |
| hsa-miR-589    | - | 136.0   | 51.6    | 2.6 |
| hsa-miR-590-5p | + | 144.2   | 144.9   | 1.0 |
| hsa-miR-590-3p | + | 86.4    | 154.0   | 1.8 |
| hsa-miR-598    | + | 130.3   | 233.8   | 1.8 |
| hsa-miR-627    | + | 97.3    | 187.3   | 1.9 |
| hsa-miR-628-5p | - | 124.6   | 114.9   | 1.1 |
| hsa-miR-652    | - | 411.4   | 235.6   | 1.7 |
| hsa-miR-671-5p | - | 127.9   | 54.9    | 2.3 |
| hsa-miR-744    | - | 426.5   | 253.9   | 1.7 |
| hsa-miR-769-5p | - | 244.0   | 213.1   | 1.1 |
| hsa-miR-886-5p | + | 128.7   | 130.5   | 1.0 |
| hsa-miR-9      | - | 4193.8  | 3492.5  | 1.2 |
| hsa-miR-92a    | + | 14252.1 | 18717.3 | 1.3 |
| hsa-miR-92b    | + | 207.7   | 251.4   | 1.2 |
| hsa-miR-93     | - | 5091.1  | 4753.0  | 1.1 |
| hsa-miR-9-3*   | - | 113.5   | 89.4    | 1.3 |
| hsa-miR-96     | - | 685.9   | 672.7   | 1.0 |
| hsa-miR-98     | - | 845.4   | 837.2   | 1.0 |
| hsa-miR-99b    | + | 564.5   | 1667.6  | 3.0 |



Table S5. List of best potential mRNA targets for non-miRNA fragments found in association with AGO proteins.

| precursor type  | name           | sequence                       | potential seed sequence | match type(s) | number of 3' UTR match(es) | number of predicted targeted genes |
|-----------------|----------------|--------------------------------|-------------------------|---------------|----------------------------|------------------------------------|
| anti-sense mRNA | <i>CLTC</i>    | CAGUUGUUCAUGAUUUUAGAAGCCAC     | AGUUGUU                 | 8mer, 7mer-m8 | 1, 1                       | 1                                  |
|                 |                |                                |                         | 8mer          | 1                          | 35                                 |
|                 | <i>WEE1</i>    | UCAAUUCUAAUUCGUAUUUGUUCUGCAC   | CAAUUCU                 | 8mer          | 2                          | 2                                  |
|                 |                |                                |                         | 7mer-m8       | 2                          | 3                                  |
| sense mRNA      | <i>CYP46A1</i> | AGAUGUACCGUGCGAUUCAGACUGU      | GAUGUAC                 | 8mer, 7mer-m8 | 1, 1                       | 2                                  |
|                 |                |                                |                         | 8mer          | 1                          | 37                                 |
| snRNA           | U12            | GGAUGCCUGGGAGUUGCGAUCUGCCCG    | GAUGCCU                 | 8mer          | 1                          | 35                                 |
|                 | U1             | GGGGACUGCGUUCGCGCUUCCCCUG      | GGGGACU                 | 8mer          | 1                          | 38                                 |
|                 | U2             | GUACCUCCAGGAACGGUGCACCA        | UACCUCC                 | 8mer          | 1                          | 22                                 |
|                 | U2-like        | AAAUGGAUUUUUGGAGCAGGGAGAUGGAAU | AAUGGAU                 | 8mer, 7mer-1A | 1, 1                       | 1                                  |
|                 |                |                                |                         | 7mer-m8       | 2                          | 2                                  |
| 8mer            | 1              | 29                             |                         |               |                            |                                    |
| vault RNA       | VTRNA1-1       | GACCCGCGGGCGCUCUCCAGUCCUUU     | ACCCGCG                 | 7mer-m8       | 1                          | 1                                  |
|                 |                |                                |                         | 7mer-1A       | 1                          | 5                                  |
|                 | ACA45          | AAGGUAGAUAGAACAGGUCUUG         | AGGUAGA                 | 8mer          | 2                          | 1                                  |
|                 |                |                                |                         | 7mer-1A       | 5                          | 1                                  |
|                 |                |                                |                         | 8mer, 7mer-m8 | 1, 1                       | 1                                  |
|                 |                |                                |                         | 8mer, 7mer-1A | 1, 1                       | 1                                  |
|                 |                |                                |                         | 7mer-m8       | 2                          | 4                                  |
|                 | 8mer           | 1                              | 30                      |               |                            |                                    |
|                 | ACA25          | GUUCUCUAUAGGAAGCCAUAGC         | UUCUCUA                 | 8mer          | 2                          | 3                                  |
|                 |                |                                |                         | 8mer, 7mer-m8 | 1, 1                       | 2                                  |
| 8mer, 7mer-1A   |                |                                |                         | 1, 1          | 5                          |                                    |

|               |                        |                                |         |                  |     |     |
|---------------|------------------------|--------------------------------|---------|------------------|-----|-----|
| snoRNA        |                        |                                |         | 7mer-m8          | 2   | 2   |
|               |                        |                                |         | 8mer             | 1   | 158 |
|               | U17a/U17b              | UCCAACGUGGAUACACCCGGGAGGUC     | CCAACGU | 8mer             | 1   | 3   |
|               | HBI-100                | UCUGAUCGUUCCCCUCCAUACA         | CUGAUCG | 8mer             | 1   | 1   |
|               | ACA47                  | ACGGUCUGGGGAAAGGCUCUGUGUU      | CGGUCUG | 8mer             | 1   | 2   |
|               | ACA17                  | UCUGUGUCAUUAGGUGGCAGAGA        | CUGUGUC | 8mer             | 2   | 1   |
|               |                        |                                |         | 8mer, 7mer-m8    | 1,1 | 2   |
|               |                        |                                |         | 8mer, 7mer-1A    | 1,1 | 2   |
| 7mer-m8       |                        |                                |         | 2                | 1   |     |
| 8mer          |                        |                                |         | 1                | 66  |     |
| tRNA          | mitochondrial tRNA-Ser | GAGAAAGCUCACAAGAACUGCUAACU     | AGAAAGC | 8mer, 7mer-m8    | 2,1 | 1   |
|               |                        |                                |         | 8mer, 7mer-m8    | 1,1 | 5   |
|               |                        |                                |         | 8mer, 7mer-1A    | 1,1 | 7   |
|               |                        |                                |         | 7mer-m8, 7mer-1A | 1,2 | 1   |
|               |                        |                                |         | 7mer-m8          | 2   | 12  |
|               |                        |                                |         | 8mer             | 1   | 104 |
|               | mitochondrial tRNA-Cys | AGCUCCGAGGUGAUUUUCAUAUUGAAUUGC | GCUCCGA | 8mer             | 1   | 4   |
|               | tRNA-His-GTG           | CGUAUAGUGGUUAGUACUCUGCGUUG     | GUAUAGU | 8mer             | 1   | 19  |
|               | mitochondrial tRNA-Met | AGUAAGGUCAGCUAAAUAAGCUAUCGGGCC | GUAAGGU | 8mer             | 4   | 1   |
|               |                        |                                |         | 8mer             | 3   | 2   |
|               |                        |                                |         | 8mer             | 1   | 25  |
|               | tRNA-Glu-CTC           | UCCCUGGUGGUCUAGUGGUUAGGAUUCGG  | CCCUGGU | 8mer, 7mer-m8    | 1,1 | 1   |
|               |                        |                                |         | 8mer, 7mer-1A    | 1,1 | 1   |
|               |                        |                                |         | 7mer-m8          | 2   | 1   |
|               |                        |                                |         | 8mer             | 1   | 74  |
|               | tRNA-Leu-CAA           | GUAAGCACCUUGCCUGCGGGCU         | UAAGCAC | 8mer             | 2   | 1   |
|               |                        |                                |         | 8mer, 7mer-m8    | 1,1 | 1   |
| 8mer, 7mer-1A |                        |                                |         | 1,1              | 8   |     |
| 7mer-m8       |                        |                                |         | 2                | 2   |     |
| 8mer          |                        |                                |         | 1                | 103 |     |
| rRNA          | 28S-like pseudogene    | ACCAAGCGUUGGAUUGUUC            | CCAAGCG | 8mer             | 1   | 4   |

Supplementary Table S6. Raw count for sequences mapping to promoter regions of coding genes.

|            | unique promoter tags | total promoter tags | percent of total library tags | fold change relative to AGO2 |
|------------|----------------------|---------------------|-------------------------------|------------------------------|
| total cell | 7820                 | 8497                | 0.251%                        | n/a                          |
| AGO1-IP    | 130                  | 238                 | 0.020%                        | 2.16                         |
| AGO2-IP    | 185                  | 507                 | 0.009%                        | 1.00                         |
| AGO3-IP    | 131                  | 299                 | 0.020%                        | 2.12                         |



Supplementary Table S7. List of genome locations for promoter-associated AGO-interacting tags

## AGO1-IP library

| chromosome | genome start | genome stop | tag                            | count | strand | refseq transcripts(s)                                                                               | refseq strand | partial tRNA overlap | tRNA match |
|------------|--------------|-------------|--------------------------------|-------|--------|-----------------------------------------------------------------------------------------------------|---------------|----------------------|------------|
| chr1       | 174443150    | 174443172   | AAAGCGGCTTGGGACAGACAGA         | 1     | -      | NM_001001740;N<br>M_022457                                                                          | -             |                      |            |
| chr15      | 63948442     | 63948470    | AAATCTCGGTGGAACCTGCATTGGTTTT   | 1     | -      | NM_004663                                                                                           | +             |                      |            |
| chr22      | 35639638     | 35639664    | AAGACTGGTCTCTCCACCACACAGA      | 1     | +      | NM_000395                                                                                           | +             |                      |            |
| chrX       | 103288748    | 103288771   | AAGAGCACAGACTTTGAAACCTG        | 1     | +      | NM_001012755                                                                                        | -             |                      |            |
| chr20      | 62071592     | 62071608    | AAGCGCCCGCCGCGC                | 3     | -      | NM_020713                                                                                           | -             |                      |            |
| chr14      | 93665664     | 93665679    | AAGTTGGGACCCGGA                | 1     | -      | NM_032036                                                                                           | -             |                      |            |
| chr1       | 226712119    | 226712142   | AATGTCCGGTCTGGTAAGCAGG         | 1     | -      | NM_033445;NM_1<br>75055                                                                             | -             |                      |            |
| chr18      | 72858119     | 72858144    | ACAGCGGACCCGAAGAATGCCTGGC      | 1     | -      | NM_001025081;N<br>M_001025090;NM<br>_001025092;NM_0<br>02385                                        | -             |                      |            |
| chr19      | 55918448     | 55918476    | ACAGGAAGAGAGAAGCTGGGAGAATCGG   | 1     | +      | NM_002975                                                                                           | +             |                      |            |
| chr20      | 61622561     | 61622583    | ACCCCGCGCGCCTCTCTGTC           | 1     | +      | NM_024299                                                                                           | +             | x                    |            |
| chr19      | 803306       | 803325      | ACCCCGGAGCCCCAGCCCC            | 1     | +      | NM_001972                                                                                           | +             |                      |            |
| chr4       | 77081160     | 77081183    | ACCCGGGCTCCGACAGCGGCTGC        | 1     | -      | NM_001042402;N<br>M_014435                                                                          | -             |                      |            |
| chr1       | 33055515     | 33055536    | ACCTGGCTGGACTCGCGTGAC          | 1     | -      | NM_001017406;N<br>M_022753                                                                          | +             |                      |            |
| chr17      | 77109708     | 77109729    | ACGGGGTTGGAGGAGGGGGGC          | 1     | +      | NM_001077182;N<br>M_012418                                                                          | +             |                      |            |
| chr15      | 48766186     | 48766199    | ACTCGGCTTCTGCTGC               | 1     | -      | NM_017672                                                                                           | -             |                      |            |
| chr12      | 48002980     | 48003001    | ACTGAGGGTACAGTTGATCGT          | 1     | -      | NM_001100620;N<br>M_005480                                                                          | +             |                      |            |
| chr19      | 40925690     | 40925691    | ACTGGCCACTGAGTTCC              | 1     | -      | NM_024660                                                                                           | -             |                      |            |
| chr8       | 110415350    | 110415379   | AGACCTCTGTTGGATCCCCGTTGAGGG    | 1     | -      | NM_020189;NM_0<br>32869                                                                             | +             |                      |            |
| chr1       | 148868535    | 148868550   | AGAGAACCCTGCGGA                | 1     | -      | NM_004436;NM_2<br>07042;NM_207043<br>;NM_207044;NM_<br>207045;NM_20704<br>6;NM_207047;NM<br>_207168 | -             |                      |            |
| chr14      | 19881247     | 19881266    | AGAGAACGGGCTCCGCGC             | 1     | -      | NM_001042618;N<br>M_005484                                                                          | +             |                      |            |
| chr18      | 18767363     | 18767385    | AGCGCGGGCTGTCCGGAGGGGT         | 1     | +      | NM_002894;NM_2<br>03291;NM_203292                                                                   | +             |                      |            |
| chr14      | 19881350     | 19881376    | AGCTGAGTGCCTCTGCTACTCCACT      | 1     | -      | NM_001042618;N<br>M_005484                                                                          | +             |                      |            |
| chr6       | 26151768     | 26151791    | AGGATGGTAAGAAGCGTAAGCGC        | 1     | -      | NM_021062                                                                                           | -             |                      |            |
| chr19      | 44518466     | 44518477    | AGGCCTGTGGACAGAAC              | 1     | -      | NM_004877                                                                                           | -             |                      |            |
| chr1       | 41100837     | 41100853    | AGGGATTGGTCTGGC                | 1     | +      | NM_133467                                                                                           | -             |                      |            |
| chr15      | 46890503     | 46890527    | AGGGTAAGGGATCTGCTAGAAGT        | 1     | -      | NM_014985                                                                                           | -             |                      |            |
| chr2       | 47986300     | 47986325    | AGTGTGCGGGCCGCGCCCGTGCAG       | 1     | -      | NM_012167;NM_0<br>18693;NM_025133                                                                   | -             |                      |            |
| chr8       | 62789920     | 62789943    | AGTTTGTCTCGGCTCTTGAAC          | 1     | +      | NM_001164754;N<br>M_001164755;NM<br>_001164756;NM_0<br>04318;NM_032466                              | -             |                      |            |
| chr14      | 19881381     | 19881410    | ATAGGGCGGAGGGAAGCTCATCAGTGGGG  | 1     | -      | NM_001042618;N<br>M_005484                                                                          | +             |                      |            |
| chr19      | 41672411     | 41672433    | ATTCTGTCCGCGCCTTGCCTC          | 1     | +      | NM_001145343;N<br>M_001145344;NM<br>_001145345;NM_0<br>32838                                        | -             |                      |            |
| chr6       | 31728214     | 31728235    | ATTTGGGGATCTCGAAGCGAT          | 1     | +      | NM_001098534;N<br>M_004639;NM_08<br>0702;NM_080703                                                  | -             |                      |            |
| chr6       | 26381140     | 26381164    | ATTTTCTGTGGTCATTTGACGGT        | 1     | +      | NM_003525                                                                                           | +             |                      |            |
| chr1       | 152458981    | 152459004   | CAAATCATGCCCTTGAATGAA          | 1     | -      | NM_001127320                                                                                        | +             |                      |            |
| chr14      | 19881114     | 19881138    | CAATGGCTGAGGTGAGGTACCCCG       | 1     | -      | NM_001042618;N<br>M_005484                                                                          | +             |                      |            |
| chr22      | 41877338     | 41877358    | CACCTCTCCCGGGACGCG             | 1     | -      | NM_000714;NM_0<br>07311                                                                             | +             |                      |            |
| chr3       | 197714930    | 197714945   | CACCTTTCGGGCGCC                | 1     | +      | NM_152617                                                                                           | -             |                      |            |
| chr14      | 50367707     | 50367729    | CAGCGGAGGGAGGAGCGGGCGG         | 1     | +      | NM_016350;NM_0<br>20921;NM_182944<br>;NM_182946                                                     | -             |                      |            |
| chr6       | 32034929     | 32034959    | CAGCTGCTGTGGCTCCAGGATGATGGAGAC | 1     | +      | NM_002904                                                                                           | -             |                      |            |
| chr6       | 37062280     | 37062304    | CCCTGGCTTCGGGAGTTTTCTCTG       | 1     | +      | NM_014341                                                                                           | -             |                      |            |
| chr19      | 4675141      | 4675167     | CCGGCCAACGCATGCGGTACCACTTT     | 1     | +      | NM_139159                                                                                           | -             |                      |            |
| chr2       | 88136334     | 88136355    | CCTCTCCGCCACCTCCACCGC          | 1     | -      | NM_016618                                                                                           | -             | x                    |            |
| chr7       | 27206742     | 27206750    | CCTCTGGGACTGTTTTCTTCCAG        | 1     | +      | NM_000522                                                                                           | -             |                      |            |
| chr6       | 31731249     | 31731266    | CCTGATCTGAAGAAGT               | 1     | -      | NM_019101                                                                                           | +             |                      |            |
| chr12      | 8126155      | 8126173     | CGACCGAGTTGGAGTACGAGTCTGTGCTGT | 2     | +      | NM_015509                                                                                           | +             |                      |            |
| chr9       | 114288568    | 114288594   | CGCGGGCCAGGACGTGTAGTAGGGAGC    | 1     | +      | NM_133465                                                                                           | +             |                      |            |

|       |           |           |                               |   |   |                                                                                                                                             |   |   |  |
|-------|-----------|-----------|-------------------------------|---|---|---------------------------------------------------------------------------------------------------------------------------------------------|---|---|--|
| chr11 | 46595692  | 46595713  | CGGATGAAAACAACACTAAC          | 1 | + | NM_001142673;NM_014741;NM_173811                                                                                                            | + |   |  |
| chr1  | 178867833 | 178867853 | CGGCGGAGGAGGAGAGAAGC          | 1 | + | NM_001135669;NM_004736                                                                                                                      | + |   |  |
| chr1  | 212521080 | 212521102 | CGGCGGCTCCCGCTCCCGGA          | 1 | - | NM_020197                                                                                                                                   | + |   |  |
| chr15 | 61268615  | 61268638  | CGGGCGTGCCCGCGAGGACTGT        | 1 | - | NM_016530                                                                                                                                   | + |   |  |
| chr14 | 19881241  | 19881260  | CGGGGCTCCGCGGAGGTC            | 1 | - | NM_001042618;NM_005484                                                                                                                      | + |   |  |
| chr10 | 70517887  | 70517910  | CGTGCAGCTGGGAGAGCTAGACT       | 1 | + | NM_002727                                                                                                                                   | + | x |  |
| chr9  | 35647986  | 35648011  | CGTGTGAAGGCTGTATCCTAGGC       | 1 | - | NM_174923                                                                                                                                   | + |   |  |
| chr3  | 39399914  | 39399918  | CTACGGTGCTGAAGC               | 1 | + | NM_017875                                                                                                                                   | + | x |  |
| chr16 | 45212753  | 45212768  | CTGACGGGTCGCTGA               | 1 | - | NM_024745                                                                                                                                   | - |   |  |
| chr2  | 85515223  | 85515248  | CTTCTCACTACTGCCTTGACTAGA      | 1 | + | NM_198482                                                                                                                                   | + |   |  |
| chr8  | 104496802 | 104496817 | GAACCTCTAGCGGAC               | 1 | + | NM_030780                                                                                                                                   | - |   |  |
| chr17 | 7963192   | 7963216   | GAAGAGCCCGATAGCTCAGTCGG       | 1 | + | NM_001165960;NM_021628                                                                                                                      | - |   |  |
| chr16 | 88422388  | 88422409  | GACCCTGCGCGCGGAAGGCG          | 1 | + | NM_032451                                                                                                                                   | + |   |  |
| chr21 | 44544268  | 44544290  | GACGGACCCTGGACGGAGCAGG        | 1 | - | NM_002626                                                                                                                                   | + |   |  |
| chr14 | 19881241  | 19881265  | GAGAACGGGGCTCCGCGGAGGTC       | 1 | - | NM_001042618;NM_005484                                                                                                                      | + |   |  |
| chr14 | 19881145  | 19881174  | GAGCTTGAACAGACTCACGGCCAGCGAA  | 1 | - | NM_001042618;NM_005484                                                                                                                      | + |   |  |
| chr22 | 29886048  | 29886068  | GAGGAACCTTGGAGCTTCGG          | 1 | - | NM_001135824;NM_001135825;NM_152267                                                                                                         | - |   |  |
| chr6  | 32034145  | 32034169  | GAGGAGGCTCTGCAGAAGAAATTC      | 1 | - | NM_006929                                                                                                                                   | + |   |  |
| chr1  | 40715676  | 40715706  | GAGGCCAGGCGAGACCCCGCTGCGGCCT  | 1 | + | NM_198494                                                                                                                                   | + |   |  |
| chr11 | 33235754  | 33235771  | GATGAGGGAGACGGGCC             | 1 | + | NM_001048200;NM_005734                                                                                                                      | + |   |  |
| chr9  | 35647974  | 35648001  | GCTGTATCCTAGGCTACACACTGAGG    | 1 | - | NM_174923                                                                                                                                   | + |   |  |
| chr17 | 45401060  | 45401076  | GCGGCACCCTCCAGCCCGGC          | 1 | + | NM_138281                                                                                                                                   | + |   |  |
| chr1  | 213322965 | 213322987 | GCGTGGCGGCGGCGGCGGCGGC        | 1 | + | NM_001017425;NM_014217                                                                                                                      | + |   |  |
| chr8  | 6553009   | 6553028   | GCTCCCTCGGCGCGGACGT           | 1 | - | NM_018361                                                                                                                                   | + |   |  |
| chr3  | 45705482  | 45705499  | GCTCGGATGTCTGTTT              | 1 | - | NM_014016                                                                                                                                   | + |   |  |
| chr12 | 60940430  | 60940451  | GCTGCCACCTCCCTACCCT           | 1 | + | NM_006313                                                                                                                                   | + |   |  |
| chr3  | 159306546 | 159306567 | GGAAAAAAGAGCGGGGCTCTGCTGGC    | 1 | - | NM_001163678;NM_003030;NM_006884                                                                                                            | - |   |  |
| chr15 | 91244068  | 91244086  | GGAAAACTTGAATTTAT             | 1 | + | NM_001042572;NM_001271                                                                                                                      | + |   |  |
| chr14 | 19881158  | 19881175  | GGAGCTTGAACAGACT              | 1 | - | NM_001042618;NM_005484                                                                                                                      | + |   |  |
| chr22 | 29886048  | 29886069  | GGAGGAACCTTGGAGCTTCGG         | 1 | - | NM_001135824;NM_001135825;NM_152267                                                                                                         | - |   |  |
| chr22 | 29886047  | 29886069  | GGAGGAACCTTGGAGCTTCGGC        | 1 | - | NM_001135824;NM_001135825;NM_152267                                                                                                         | - |   |  |
| chr22 | 29886046  | 29886069  | GGAGGAACCTTGGAGCTTCGGCA       | 1 | - | NM_001135824;NM_001135825;NM_152267                                                                                                         | - |   |  |
| chr12 | 119609348 | 119609365 | GGAGGCTGAGAGCGAC              | 1 | + | NM_014730                                                                                                                                   | + | x |  |
| chr3  | 142253112 | 142253129 | GGCCCCGGCGCGCCGG              | 1 | - | NM_080862                                                                                                                                   | + |   |  |
| chr14 | 19881113  | 19881134  | GGCTGAGGTGAGGTACCCCGC         | 1 | - | NM_001042618;NM_005484                                                                                                                      | + |   |  |
| chr10 | 129595088 | 129595103 | GGTCCCGCGGAGT                 | 1 | + | NM_006504                                                                                                                                   | + |   |  |
| chr9  | 35647985  | 35648015  | GGTTCGTGCTGAAGGCTGTATCCTAGGCT | 1 | - | NM_174923                                                                                                                                   | + |   |  |
| chr22 | 30476039  | 30476057  | GTAGACCTGGCAGCAGC             | 1 | - | NM_173566                                                                                                                                   | - |   |  |
| chr2  | 17798354  | 17798373  | GTAGGGTGAAGGCGCGCGC           | 1 | - | NM_001130009;NM_001142286;NM_024624;NM_182625                                                                                               | + |   |  |
| chr4  | 140436307 | 140436318 | GTCGAGTCGGCTGC                | 2 | + | NM_002494                                                                                                                                   | - |   |  |
| chr1  | 39729925  | 39729946  | GTCGCCCTGCGCTGCGCGGA          | 1 | + | NM_181809                                                                                                                                   | + |   |  |
| chr22 | 36575404  | 36575415  | GCTTTATCCCGCTGATGATT          | 1 | + | NM_016091                                                                                                                                   | + |   |  |
| chr15 | 63948442  | 63948462  | GTGGAACCTGCATTGGTTTT          | 1 | - | NM_004663                                                                                                                                   | + |   |  |
| chr14 | 19881363  | 19881387  | GTGGGGCCACGAGCTGAGTGCCTC      | 1 | - | NM_001042618;NM_005484                                                                                                                      | + |   |  |
| chr9  | 35647995  | 35648017  | GTGGTTCGTGCTGAAGGCTGT         | 1 | - | NM_174923                                                                                                                                   | + |   |  |
| chr14 | 19881113  | 19881141  | GTTCAATGGCTGAGGTGAGGTACCCCGC  | 2 | - | NM_001042618;NM_005484                                                                                                                      | + |   |  |
| chr10 | 70517882  | 70517910  | GTTGGCGTGCAGCTGGGAGAGCTAGACT  | 1 | + | NM_002727                                                                                                                                   | + | x |  |
| chr1  | 205992069 | 205992091 | GTTGGGGATTGTTGCTCCCAT         | 1 | + | NM_002389;NM_153826;NM_172350;NM_172351;NM_172352;NM_172353;NM_172354;NM_172355;NM_172356;NM_172357;NM_172358;NM_172359;NM_172360;NM_172361 | + |   |  |
| chr7  | 6596498   | 6596526   | GTTGTACCCTGGACATCTACTTCAGC    | 1 | + | NM_024067                                                                                                                                   | + |   |  |
| chr12 | 52180694  | 52180724  | GTTCCGAGGGCTCTGGAGCTGGTGCAGG  | 1 | - | NM_004178;NM_134323                                                                                                                         | + |   |  |
| chr8  | 49036068  | 49036091  | TACTCGCCAGGTGACTCGGAGT        | 1 | + | NM_001081640;NM_005914;NM_006904;NM_182746                                                                                                  | - |   |  |
| chr12 | 6923270   | 6923293   | TAGGCTTTCTGGCTTTTACCGG        | 1 | + | NM_138425                                                                                                                                   | + |   |  |

|       |           |           |                           |    |   |                                                         |   |   |   |
|-------|-----------|-----------|---------------------------|----|---|---------------------------------------------------------|---|---|---|
| chr17 | 15788922  | 15788945  | TACAGCTCGAGCTCGGAGGCTGT   | 1  | - | NM_000676                                               | + |   |   |
| chr1  | 201162904 | 201162927 | TCCCGAGCCGCTGCTAGCCCCG    | 1  | - | NM_021633                                               | - |   |   |
| chr1  | 243094354 | 243094375 | TCCGCTCTGCAGCAGAACCC      | 1  | - | NM_004501;NM_031844                                     | - |   |   |
| chr19 | 44618693  | 44618716  | TCGACTACCGAGCTCTTCTTTG    | 1  | + | NM_001020                                               | - |   |   |
| chr14 | 22468832  | 22468850  | TCGCAGCTTCGCTGCGTG        | 1  | + | NM_001039619;NM_006109                                  | - |   |   |
| chr6  | 122834624 | 122834647 | TCGAAAGGCGAGAAAGAAGCTG    | 1  | - | NM_020755;NM_181794                                     | - |   |   |
| chr14 | 68934720  | 68934737  | TCGGCAGCTGCTGTAGC         | 1  | - | NM_004450;NM_018375                                     | - |   |   |
| chr12 | 6923265   | 6923288   | TCTAGTAGGCTTTCTGGCTTTT    | 1  | + | NM_138425                                               | + |   |   |
| chr17 | 70256396  | 70256416  | TCTCTGGCTCCTCGGGCT        | 6  | + | NM_004252                                               | + | x | x |
| chr17 | 70256396  | 70256417  | TCTCTGGCTCCTCGGGCTC       | 1  | + | NM_004252                                               | + | x | x |
| chr17 | 70256396  | 70256418  | TCTCTGGCTCCTCGGGCTCG      | 47 | + | NM_004252                                               | + | x | x |
| chr17 | 70256396  | 70256419  | TCTCTGGCTCCTCGGGCTCGC     | 45 | + | NM_004252                                               | + | x | x |
| chr17 | 70256396  | 70256420  | TCTCTGGCTCCTCGGGCTCGCG    | 2  | + | NM_004252                                               | + | x |   |
| chr1  | 202033243 | 202033263 | TCTGGTACGAATTGTGGAGA      | 1  | + | NM_001174108                                            | + |   |   |
| chr15 | 83724873  | 83724896  | TGAAGCGCTGTGCTCTGCCGAG    | 2  | + | NM_006738;NM_007200                                     | + | x | x |
| chr15 | 83724873  | 83724897  | TGAAGCGCTGTGCTCTGCCGAGA   | 2  | + | NM_006738;NM_007200                                     | + | x |   |
| chr22 | 20326041  | 20326045  | TGACCCAGTATCAGAGAGGGCTAGG | 1  | + | NM_022044                                               | + |   |   |
| chr19 | 10352582  | 10352604  | TGACCTAGGACACAGCTGCAT     | 1  | + | NM_003331                                               | - |   |   |
| chr10 | 88403986  | 88404011  | TGAGTGTGTGTGTGTGTGTGTGA   | 5  | - | NM_001030015;NM_033282                                  | + |   |   |
| chr15 | 65204813  | 65204829  | TGCATGGACCTCTGTC          | 1  | + | NM_001145102                                            | + |   |   |
| chr2  | 27127643  | 27127659  | TGCCCCATCCTCCAC           | 1  | + | NM_001035507;NM_021831                                  | + |   |   |
| chr18 | 41932207  | 41932234  | TGCGGCTGCAGAGTACCGCTCGGGA | 1  | - | NM_004046                                               | - |   |   |
| chr1  | 46855112  | 46855136  | TGGCGGGGCCGGGGCGGAGCTGGC  | 1  | - | NM_201403                                               | - |   |   |
| chr8  | 145553091 | 145553113 | TGGCTGCTGCCGGTCTGCGC      | 1  | + | NM_012162;NM_024531;NM_024555                           | - |   |   |
| chr1  | 40496145  | 40496165  | TGGGCTAGTGAACGCGGCGA      | 1  | - | NM_005857                                               | + |   |   |
| chr1  | 40496142  | 40496165  | TGGGCTAGTGAACGCGGCGAAGT   | 1  | - | NM_005857                                               | + |   |   |
| chr18 | 17538706  | 17538729  | TGGTCGGGAGTAGGCAGCGGCGC   | 1  | - | NM_138340                                               | - |   |   |
| chr15 | 43280713  | 43280735  | TGTGAAACAATGGTACGGCAA     | 1  | + | NM_138356                                               | - |   |   |
| chr2  | 85515224  | 85515248  | TTCTCACTACTGCACTTGACTAGA  | 2  | + | NM_198482                                               | + |   |   |
| chr20 | 18436483  | 18436505  | TTGATTGGCCAGTGGACAGCGC    | 1  | + | NM_001172745;NM_001172746;NM_006363;NM_032985;NM_032986 | + |   |   |
| chrY  | 15243288  | 15243308  | TTGGAGTTTTCGAAAGACTT      | 1  | + | NM_001164238                                            | + |   |   |
| chr15 | 43280712  | 43280735  | TTGTGAAACAATGGTACGGCAA    | 1  | + | NM_138356                                               | - |   |   |
| chr11 | 767649    | 767670    | TTTGGCCCCGGGGTTTCGGC      | 1  | + | NM_182612                                               | - |   |   |

AGO2-IP library

| chromosome | genome start | genome stop | tag                      | count | strand | refseq transcript(s)                                       | refseq strand | partial tRNA overlap | tRNA match |
|------------|--------------|-------------|--------------------------|-------|--------|------------------------------------------------------------|---------------|----------------------|------------|
| chr20      | 43767202     | 43767224    | AAAGACATAGTTGCAAGATGGG   | 1     | -      | NM_172006;NM_172131                                        | -             |                      |            |
| chr18      | 3441686      | 3441690     | AACGCGCGGAGCTTCCCTCTGC   | 1     | +      | NM_170695;NM_173210                                        | +             |                      |            |
| chr10      | 105117798    | 105117813   | AACGCTGCTACTCCGCAAGC     | 1     | +      | NM_006951                                                  | +             |                      |            |
| chr4       | 140442112    | 140442134   | AACTGAACAGACCCAGAGGC     | 1     | -      | NM_057175                                                  | +             |                      |            |
| chrX       | 103288748    | 103288771   | AAGAGCACAGACTTTGAAACCTG  | 4     | +      | NM_001012755                                               | -             |                      |            |
| chr2       | 160181472    | 160181495   | AATACTGTAGCTTTGAGTTTGA   | 1     | +      | NM_013450                                                  | -             |                      |            |
| chr1       | 219119312    | 219119334   | AATGAGCGCTCGGATCGAGGTC   | 1     | +      | NM_021958                                                  | +             |                      |            |
| chr3       | 135686764    | 135686777   | ACAAGATAATCAGTGTGCCCTGG  | 1     | -      | NM_001042383;NM_001042384;NM_001042400;NM_015391;NM_025180 | +             |                      |            |
| chr8       | 95801110     | 95801131    | ACAGCTGTAGCTCCTGGCCGC    | 1     | -      | NM_181787                                                  | +             |                      |            |
| chr17      | 40750530     | 40750551    | ACATGCGCCCTCGGCTTCTGG    | 1     | +      | NM_003954                                                  | -             |                      |            |
| chr2       | 113310804    | 113310827   | ACCAAACCTCTTCGAGGCACAAG  | 1     | -      | NM_000576                                                  | -             |                      |            |
| chr21      | 35343417     | 35343439    | ACCACAAGTTGGGTAGCCTGGC   | 1     | -      | NM_001754                                                  | -             |                      |            |
| chr7       | 100302542    | 100302566   | ACCATGAATAAAAGACCAAAACAC | 1     | +      | NM_003302                                                  | +             |                      |            |
| chr4       | 77081159     | 77081183    | ACCCGGGCTCCGACAGCGGCTGCA | 1     | -      | NM_001042402;NM_014435                                     | -             |                      |            |
| chrX       | 71442451     | 71442469    | ACCGGACTTGGAGTCAGA       | 1     | -      | NM_001144885;NM_001144887                                  | -             |                      |            |
| chr14      | 94693807     | 94693828    | ACCTTGGCGTTGGCCGCGAGT    | 2     | +      | NM_177438                                                  | -             |                      |            |
| chr22      | 41877376     | 41877398    | ACTCGCGTCCCCGCGGACCCGG   | 1     | -      | NM_000714;NM_007311                                        | +             |                      |            |
| chr11      | 77383495     | 77383515    | ACTGCCTCGCCACTGTACGG     | 1     | +      | NM_033547                                                  | -             |                      |            |
| chr13      | 31787664     | 31787685    | ACTGCTGCGCTCTGCTGCGC     | 3     | +      | NM_000059                                                  | +             |                      |            |
| chr16      | 84204441     | 84204460    | ACTGGGCGACGGTGGCTCC      | 1     | +      | NM_014615                                                  | +             |                      |            |
| chr5       | 130627153    | 130627176   | AGAGCCCATCTCTGACCACTGC   | 1     | -      | NM_001038702;NM_020240                                     | +             |                      |            |
| chr1       | 180627525    | 180627548   | AGAGTCGAGAGTGGGAGAAGAGC  | 1     | -      | NM_001033056                                               | -             |                      |            |
| chr14      | 23675234     | 23675254    | AGCGCCCTACCGCTTTCGCT     | 1     | +      | NM_006263;NM_176783                                        | +             | x                    | x          |
| chr1       | 100276278    | 100276299   | AGCGGCTCGGCCGCGAGTAG     | 1     | +      | NM_033055                                                  | +             | x                    |            |
| chr22      | 29886044     | 29886067    | AGGAACCTTGGAGCTTCGGCAGC  | 1     | -      | NM_001135824;NM_001135825;NM_152267                        | -             |                      |            |

|       |           |           |                              |   |                                                                                                                        |   |   |  |
|-------|-----------|-----------|------------------------------|---|------------------------------------------------------------------------------------------------------------------------|---|---|--|
| chr7  | 142788539 | 142788559 | AGGCTGCTCCGGACCGGGAC         | 1 | NM_001010972;N<br>+ M_003461                                                                                           | + |   |  |
| chr7  | 142788539 | 142788561 | AGGCTGCTCCGGACCGGGACGC       | 1 | NM_001010972;N<br>+ M_003461                                                                                           | + |   |  |
| chr15 | 87588038  | 87588059  | AGGGACCGCCGATGAGCACGC        | 1 | NM_001113378;N<br>- M_018193                                                                                           | + |   |  |
| chr3  | 109790867 | 109790890 | AGTCCTTGCTCCTGACTGTCACT      | 1 | NM_014648;NM_0<br>- 20890                                                                                              | + |   |  |
| chr2  | 27504996  | 27505017  | AGTTCGGTTGCGCTGCGGAGC        | 1 | + NM_013392                                                                                                            | + |   |  |
| chr21 | 44485219  | 44485241  | ATCTCCCGCCCGGAGGTTGC         | 1 | - NM_015259                                                                                                            | - |   |  |
| chr12 | 54497725  | 54497752  | ATGGCGACCGAGACGGTGGAGCTCCAT  | 1 | NM_014182;NM_0<br>- 33082                                                                                              | + |   |  |
| chr17 | 57360256  | 57360280  | ATTCTGGTAGGCTCTGATTCCAG      | 1 | + NM_020748                                                                                                            | - |   |  |
| chr7  | 99451161  | 99451184  | ATTGTGTCTGTGTCGAGGCGTCG      | 1 | + NM_003439                                                                                                            | + | x |  |
| chr5  | 134815992 | 134816015 | CAAACCTCAGCAGTGAATTGC        | 1 | - NM_001099221                                                                                                         | - |   |  |
| chr6  | 53038007  | 53038033  | CACGCGGGTTGGGCTTGAGGTTCCGC   | 1 | NM_033480;NM_0<br>+ 33481                                                                                              | + |   |  |
| chr17 | 15788922  | 15788944  | CACGCTCGAGCTCGGAGGCTGT       | 1 | - NM_000676                                                                                                            | + |   |  |
| chr9  | 4974858   | 4974880   | CAGCCGGGACCCAGCGTTTCGC       | 1 | + NM_004972                                                                                                            | + |   |  |
| chr16 | 73292456  | 73292478  | CAGTCCTTCTCATACTGTGTCC       | 1 | NM_001142497;N<br>- M_152649                                                                                           | - |   |  |
| chr16 | 83618902  | 83618923  | CAGTCGCCGACGAGCCGAGT         | 1 | + NM_014732                                                                                                            | + |   |  |
| chr9  | 94936299  | 94936321  | CATGGACTCGGGAACCGAGGAG       | 1 | - NM_004148                                                                                                            | - |   |  |
| chr11 | 59334821  | 59334826  | CCCCACTGAGCGGTGCTCTGAGC      | 1 | - NM_017840                                                                                                            | - |   |  |
| chr11 | 123117539 | 123117559 | CCCGCGCGCTCGGATCCGG          | 1 | - NM_003455                                                                                                            | - |   |  |
| chr10 | 135042786 | 135042807 | CCCTCGGACTGCCCGACCGC         | 1 | NM_152911;NM_2<br>+ 07127;NM_207128                                                                                    | + |   |  |
| chr2  | 10359990  | 10360003  | CCCTCCCACGCTGTTCCGGGG        | 1 | - NM_002149                                                                                                            | + |   |  |
| chr4  | 689592    | 689613    | CCGACGCGCGCTCGGCTCGG         | 1 | + NM_006315                                                                                                            | + |   |  |
| chr6  | 71434291  | 71434299  | CCGCCGCCGCCCTCCTCCCGT        | 1 | NM_001044305;N<br>+ M_021940                                                                                           | + |   |  |
| chr1  | 44213285  | 44213288  | CCGCCGTCGCCCATGACGGGG        | 1 | NM_001039457;N<br>+ M_004047                                                                                           | + |   |  |
| chr15 | 77024399  | 77024419  | CCGCGGACCCTGAGCGCAAG         | 1 | NM_004390;NM_1<br>- 48979                                                                                              | - | x |  |
| chr15 | 77024396  | 77024419  | CCGCGGACCCTGAGCGCAAGAGC      | 1 | NM_004390;NM_1<br>- 48979                                                                                              | - | x |  |
| chr1  | 1500261   | 1500284   | CCGCGGCCCGCGTTCGTCTCT        | 1 | + NM_014188                                                                                                            | - |   |  |
| chr6  | 10831060  | 10831083  | CCGGAGTTGGACTGGGACTTGC       | 1 | NM_001165258;N<br>- M_016462                                                                                           | + |   |  |
| chr2  | 85051572  | 85051595  | CCGGCGGTCGCGACGGGGGCGAC      | 1 | - NM_020122                                                                                                            | + |   |  |
| chr1  | 1465627   | 1465650   | CCGGGGCCGGGGGGCGCCGGGG       | 1 | - NM_001114748                                                                                                         | - |   |  |
| chr2  | 65069634  | 65069656  | CCTCGGGGCCAGAGGGCCCGGG       | 1 | - NM_003038                                                                                                            | + |   |  |
| chr1  | 151910403 | 151910426 | CGAAACATCTCTGCTATCGGA        | 1 | + NM_004515                                                                                                            | - |   |  |
| chr3  | 33113609  | 33113630  | CGAAGCGGCCGCTGGGCGC          | 1 | NM_000404;NM_0<br>01039770;NM_001<br>079811;NM_00113<br>5602;NM_0011362<br>38                                          | - |   |  |
| chr7  | 4781598   | 4781621   | CGCGACCCCGAACCTCGGCACT       | 1 | - NM_014855                                                                                                            | + |   |  |
| chr4  | 53938499  | 53938522  | CGCGCGGCCACCTGGGCTGGT        | 1 | NM_001134937;N<br>M_001134938;NM<br>_030917                                                                            | + |   |  |
| chr22 | 49311120  | 49311141  | CGCTCGTACTCTCCGACCGCG        | 1 | NM_001169109;N<br>M_001169110;NM<br>_001169111;NM_0<br>- 05138                                                         | - |   |  |
| chr9  | 74169914  | 74169938  | CGGCCGGGACCGGAGCTGTGTGC      | 1 | NM_001102420;N<br>M_001102421;NM<br>_006007                                                                            | - |   |  |
| chr6  | 149680522 | 149680544 | CGGCGACGCCCGCCAGCCGTCG       | 2 | + NM_015093                                                                                                            | + |   |  |
| chr8  | 144750386 | 144750409 | CGGCGCATCCCGTCTGGAAGC        | 1 | NM_001130053;N<br>M_001130054;NM<br>_001130055;NM_0<br>01130056;NM_001<br>130057;NM_00196<br>0;NM_032378;NM<br>_032862 | - |   |  |
| chr2  | 241944405 | 241944425 | CGGCTGCTGCTTGGACTGC          | 1 | + NM_014808                                                                                                            | + |   |  |
| chr11 | 1367306   | 1367327   | CGGGACCTGGGAGCCTCCAGC        | 1 | - NM_003957                                                                                                            | + |   |  |
| chr1  | 153379597 | 153379625 | CGGGCCGCGCGGGGAAGGGGAGACGTGG | 1 | NM_018973;NM_1<br>- 53741                                                                                              | - |   |  |
| chr17 | 32790479  | 32790500  | CGGGCCGCGGGCGGCCCTGG         | 1 | + NM_198836                                                                                                            | - |   |  |
| chr16 | 66614408  | 66614427  | CGGTCCGGTCAACACAGC           | 1 | + NM_017803                                                                                                            | + |   |  |
| chr11 | 57236670  | 57236686  | CGGTCTTGGCACCTCT             | 1 | NM_001144012;N<br>M_015959;NM_15<br>+ 3450                                                                             | + |   |  |
| chr1  | 43005228  | 43005254  | CGGTTCCGTTAGGTCTGAGGGAGCGA   | 1 | NM_001146289;N<br>M_022356;NM_02<br>- 4097                                                                             | - | x |  |
| chr5  | 133368434 | 133368454 | CGTCCAGGCCGGCCAGGGT          | 1 | + NM_003374                                                                                                            | - |   |  |
| chr3  | 48569711  | 48569731  | CGTGCGGGTACGTAGGCCTCG        | 1 | - NM_004567                                                                                                            | - |   |  |
| chr1  | 158190967 | 158190993 | CTATGTTGCTGTGATCATTGATCTT    | 1 | NM_001146172;N<br>M_001146173;NM<br>_033438                                                                            | - |   |  |
| chr16 | 65196151  | 65196167  | CTCCGGGCGCGAGAAGAGGGGAGCCAG  | 1 | NM_001048251;N<br>M_144601;NM_18<br>+ 1553;NM_181554                                                                   | + |   |  |
| chr22 | 31200795  | 31200817  | CTCGGTCTCTGGAATAGAGCGC       | 1 | NM_001033024;N<br>- M_012179                                                                                           | + | x |  |

|       |           |           |                               |    |   |                                                                          |   |   |   |
|-------|-----------|-----------|-------------------------------|----|---|--------------------------------------------------------------------------|---|---|---|
| chr2  | 10870610  | 10870630  | CTCTCGGGGTGCTGCTCGGA          | 1  | + | NM_005742                                                                | - |   |   |
| chr1  | 115061153 | 115061176 | CTCTGGGTAAAGAGGCCGTTTAT       | 1  | - | NM_002524                                                                | - |   |   |
| chr2  | 112729100 | 112729122 | CTCTGGGTCCGTCTCGTCGCGT        | 1  | - | NM_032494                                                                | - |   |   |
| chr6  | 36272360  | 36272382  | CTGAACAGGAGCGAGAGCGCGA        | 1  | - | NM_015695                                                                | + |   |   |
| chr2  | 85692614  | 85692636  | CTGCGTCCCGGCTCTGTATGG         | 1  | - | NM_001013649                                                             | - |   |   |
| chr12 | 54838422  | 54838445  | GAAAAGGTCCCGGAGAGCTGAGC       | 1  | + | NM_021019;NM_079423                                                      | + | x |   |
| chrX  | 118776605 | 118776628 | GAAGGGCAGCTAACGCTGGACAC       | 1  | + | NM_001105576                                                             | + |   |   |
| chr2  | 159533211 | 159533233 | GACCGGTGGAGCGCGGAGCGC         | 1  | - | NM_001145909;NM_033394                                                   | + |   |   |
| chr14 | 94693806  | 94693827  | GACCTTGGCGTTGGGCCGAG          | 1  | + | NM_177438                                                                | - |   |   |
| chr17 | 77129793  | 77129816  | GACGGGCCCGCGCACGATGGC         | 1  | - | NM_025161                                                                | - |   |   |
| chr5  | 175017719 | 175017738 | GAGGCGAACCGGGTGCAGG           | 1  | + | NM_001131055                                                             | + |   |   |
| chr17 | 24741817  | 24741841  | GAGGGCTCGGCTGTGTGAGGACT       | 1  | + | NM_020791                                                                | + |   |   |
| chr4  | 8322424   | 8322446   | GATGCCCTGCGCCCTGACGC          | 1  | + | NM_053044                                                                | + | x | x |
| chr1  | 159451698 | 159451722 | GCACAGTGTGTCAGAACGGCCGA       | 1  | + | NM_004106                                                                | + | x |   |
| chr5  | 65476265  | 65476288  | GCACCCGGTTCCGCCGCTCTGC        | 1  | + | NM_001077199;NM_139168                                                   | + |   |   |
| chr10 | 44775255  | 44775279  | GCAGCTCCGGTCAAGCGAGGACA       | 1  | + | NM_032023                                                                | + |   |   |
| chr11 | 525536    | 525558    | GCCGCCGTGCCTGCGCCCGC          | 1  | - | NM_001130442;NM_005343;NM_176795                                         | - |   |   |
| chr11 | 118393950 | 118393971 | GCCTAAGGACGACAAGAAGAAG        | 1  | - | NM_001028;NM_016146                                                      | - |   |   |
| chr9  | 92603674  | 92603695  | GCCTCTCTCTCCCGCCGAC           | 1  | - | NM_001135052;NM_001174168;NM_003177                                      | + |   |   |
| chr1  | 115102134 | 115102149 | GCGAGAGAAGCGAGA               | 1  | - | NM_001007553;NM_001130523;NM_007158                                      | - |   |   |
| chr13 | 100125047 | 100125069 | GCGGGTGCCTGGAGCCGCCAGA        | 1  | - | NM_001079669;NM_032813                                                   | - |   |   |
| chr5  | 130998738 | 130998757 | GCTAGAGTTCGGACCTTGT           | 1  | - | NM_001164386;NM_001164387;NM_001164388;NM_001164389;NM_0164390;NM_016340 | - |   |   |
| chr19 | 54188902  | 54188924  | GCTAGCCTAGAGGAGCCAGAAC        | 1  | + | NM_001161587;NM_002103;NM_006666                                         | - |   |   |
| chr3  | 142688558 | 142688580 | GCTCCGCTCGCCGCTACGC           | 1  | + | NM_006506                                                                | + |   |   |
| chr2  | 27518600  | 27518623  | GCTGTAATAAAAGTCTACTTTT        | 1  | + | NM_001168364;NM_173853                                                   | + |   |   |
| chr22 | 29886048  | 29886069  | GGAGGAACCTTGAGCTTCGG          | 11 | - | NM_001135824;NM_001135825;NM_152267                                      | - |   |   |
| chr22 | 29886047  | 29886069  | GGAGGAACCTTGAGCTTCGGC         | 29 | - | NM_001135824;NM_001135825;NM_152267                                      | - |   |   |
| chr22 | 29886046  | 29886069  | GGAGGAACCTTGAGCTTCGGCA        | 2  | - | NM_001135824;NM_001135825;NM_152267                                      | - |   |   |
| chr22 | 29886045  | 29886069  | GGAGGAACCTTGAGCTTCGGCAG       | 2  | - | NM_001135824;NM_001135825;NM_152267                                      | - |   |   |
| chr6  | 26312869  | 26312899  | GGCGGAAAGGGACTGGGTAAGGAGGCGCT | 1  | + | NM_003545                                                                | + |   |   |
| chr6  | 74420358  | 74420385  | GGCCCGGCGCTCCCTCTCTGCCAGGTGGC | 1  | - | NM_012434                                                                | - | x |   |
| chr2  | 27200091  | 27200113  | GGTCGCCTAGTGCCTCGCGCGG        | 1  | - | NM_032604                                                                | + |   |   |
| chr1  | 37930515  | 37930533  | GTAGTAGTTTGTATAGTT            | 1  | + | NM_018101                                                                | + |   |   |
| chr2  | 48521241  | 48521263  | GTCCAAGATGGCGACCTGGAAC        | 1  | - | NM_001135629;NM_001135630;NM_152994                                      | + |   |   |
| chr1  | 114216294 | 114216317 | GTCCGGGTAGAAGACATGTCACT       | 1  | - | NM_012411;NM_015967                                                      | - |   |   |
| chr1  | 39729925  | 39729945  | GTCCGCCCTGCGCTGCGCGG          | 1  | + | NM_181809                                                                | + |   |   |
| chr4  | 76817495  | 76817517  | GTCGGAGGAAGGGGGCGGCGAG        | 1  | - | NM_012297;NM_203504;NM_203505                                            | - |   |   |
| chr10 | 134201297 | 134201318 | GTCGGCGGCGGCTGCGGGAAC         | 1  | + | NM_005539                                                                | + |   |   |
| chr17 | 35532187  | 35532207  | GTGGAGCCGCGGCTGAGGC           | 1  | - | NM_001012241                                                             | + |   |   |
| chr9  | 99858813  | 99858834  | GTGGGTCTCGCAGCGTTGCTC         | 1  | + | NM_018946                                                                | + |   |   |
| chr1  | 180628154 | 180628175 | GTTCCCAAGGCTGGAAGAGC          | 1  | + | NM_001033044;NM_002065                                                   | - |   |   |
| chr22 | 18222343  | 18222363  | GTTCCCGACTCCGGCAAGAG          | 1  | - | NM_024627;NM_053004                                                      | - |   |   |
| chr21 | 33774396  | 33774415  | TATCTACGGTTCGGGCGAG           | 1  | + | NM_006134                                                                | - |   |   |
| chr11 | 67032694  | 67032715  | TCAAAGCCCTGCGTCTTCGG          | 1  | - | NM_005851                                                                | - |   |   |
| chr1  | 112740356 | 112740378 | TCAGCCGCTGTGGATGGGGAGT        | 2  | + | NM_018704                                                                | + |   |   |
| chr11 | 113149599 | 113149622 | TCAGCGTTGGTTCCCGTCTGGC        | 3  | - | NM_004724                                                                | - |   |   |
| chr2  | 200483900 | 200483922 | TCAGGGCTTAAAGGGAGACAT         | 1  | - | NM_153689                                                                | + |   |   |
| chr6  | 43135118  | 43135146  | TCATCTAGGAGCACCGAGCAGCTTGCT   | 1  | - | NM_015950;NM_138343;NM_201521;NM_201522;NM_201523                        | - |   |   |
| chr16 | 48744361  | 48744382  | TCCATGCGGCCTCGTCCACGC         | 1  | + | NM_001040284;NM_001040285                                                | + |   |   |
| chr10 | 73646195  | 73646200  | TCCCCTCTCGGCCACTTTTCT         | 1  | + | NM_015947;NM_173473                                                      | - |   |   |
| chr3  | 41215646  | 41215667  | TCCCCTGTCCAAGCCCGACG          | 1  | - | NM_001098209;NM_001098210;NM_001904                                      | + |   |   |
| chr1  | 201162907 | 201162927 | TCCCGAGCCGCTGTAGCC            | 1  | - | NM_021633                                                                | - |   |   |

|       |           |           |                             |     |   |                                                                         |   |   |   |
|-------|-----------|-----------|-----------------------------|-----|---|-------------------------------------------------------------------------|---|---|---|
| chr20 | 44426375  | 44426394  | TCCCGGCGCACTCCAGAG          | 1   | - | NM_015945;NM_173073;NM_173179                                           | - |   |   |
| chr3  | 37259630  | 37259652  | TCCGAACTCGTGCCTGGAGG        | 1   | - | NM_001172713;NM_002078                                                  | + |   |   |
| chr9  | 99858650  | 99858675  | TCCGCGCCCTCTCTGTGCGAGGC     | 1   | - | NM_018946                                                               | + |   |   |
| chr1  | 40399711  | 40399727  | TCCGGCGGTAGCGGGAGCCGGA      | 1   | + | NM_012421                                                               | + |   |   |
| chr2  | 73193696  | 73193717  | TCCGGGCTGGTCTGCGGCTGC       | 1   | - | NM_015470                                                               | - |   |   |
| chr7  | 26207635  | 26207657  | TCCGGTCACTGCTCGCCCCG        | 1   | + | NM_002137;NM_007276;NM_016587;NM_031243                                 | - |   |   |
| chr1  | 111308025 | 111308046 | TCCGGTTTCTGCGCGGTGCGC       | 1   | - | NM_001006945;NM_018372                                                  | - |   |   |
| chr17 | 23950471  | 23950493  | TCCGTGGATGGAGAAGAGGAAT      | 1   | + | NM_006461                                                               | - |   |   |
| chr21 | 44544276  | 44544299  | TCCTCGCAGGACGGACCTGGAC      | 1   | - | NM_002626                                                               | + |   |   |
| chr1  | 232812194 | 232812216 | TCGCCCCGGTCTGGAGGCCCGC      | 1   | - | NM_001077397;NM_182972                                                  | - |   |   |
| chr16 | 3010411   | 3010413   | TCGCTGCGCCGGTTGCTGCGGC      | 1   | + | NM_016639                                                               | + | x |   |
| chr17 | 40654729  | 40654748  | TCGGCCTCGCCTCGGTGGC         | 1   | + | NM_005892                                                               | + |   |   |
| chr10 | 13430186  | 13430202  | TCGGCGCGCCCTGCGGAGC         | 1   | + | NM_012247                                                               | - |   |   |
| chr2  | 242322725 | 242322746 | TCGGCGGCTCTGGCCTGCGG        | 1   | + | NM_152783                                                               | + |   |   |
| chr19 | 38485170  | 38485172  | TCTAACTCCCCATGGAGTCGGC      | 1   | - | NM_004364                                                               | - |   |   |
| chr3  | 17759434  | 17759456  | TCTCCTGCTTCAACCGGCGC        | 1   | + | NM_001134380                                                            | - |   |   |
| chr3  | 17759434  | 17759458  | TCTCCTGCTTCAACCGGCGCGC      | 1   | + | NM_001134380                                                            | - |   |   |
| chr17 | 70256398  | 70256419  | TCTCGGCTCCTCGCGGCTCGC       | 1   | + | NM_004252                                                               | + | x |   |
| chr17 | 70256396  | 70256416  | TCTCTCGGCTCCTCGCGGCT        | 8   | + | NM_004252                                                               | + | x | x |
| chr17 | 70256396  | 70256417  | TCTCTCGGCTCCTCGCGGCTC       | 4   | + | NM_004252                                                               | + | x | x |
| chr17 | 70256396  | 70256418  | TCTCTCGGCTCCTCGCGGCTCG      | 91  | + | NM_004252                                                               | + | x | x |
| chr17 | 70256396  | 70256419  | TCTCTCGGCTCCTCGCGGCTCGC     | 143 | + | NM_004252                                                               | + | x | x |
| chr17 | 70256396  | 70256420  | TCTCTCGGCTCCTCGCGGCTCGCG    | 1   | + | NM_004252                                                               | + | x |   |
| chr17 | 77129799  | 77129819  | TCTGACGGGCCCGCGCGCAC        | 1   | - | NM_025161                                                               | - |   |   |
| chr20 | 61639505  | 61639532  | TCTGAGGGTTGGGAAGGCAGCGCTGC  | 1   | - | NM_005975                                                               | - |   |   |
| chr9  | 6403210   | 6403231   | TCTGCGCGCGCAGACATGGC        | 1   | + | NM_152896                                                               | + |   |   |
| chr9  | 6403210   | 6403232   | TCTGCGCGCGCAGACATGGCC       | 1   | + | NM_152896                                                               | + |   |   |
| chr17 | 57360258  | 57360280  | TCTGGTAGGCTCTGATTTCCAG      | 1   | + | NM_020748                                                               | - |   |   |
| chr17 | 71292205  | 71292227  | TGAAACTGGAGCGCCTGGAGGA      | 1   | - | NM_001080419                                                            | + |   |   |
| chr16 | 29738904  | 29738927  | TGAAATAAAGATGCAGAGCTAT      | 1   | + | NM_005115;NM_017458                                                     | + |   |   |
| chr15 | 83724873  | 83724896  | TGAAGCGCCTGTGCTTGCCGAG      | 12  | + | NM_006738;NM_007200                                                     | + | x | x |
| chr15 | 83724873  | 83724897  | TGAAGCGCCTGTGCTTGCCGAGA     | 8   | + | NM_006738;NM_007200                                                     | + | x |   |
| chr19 | 10352582  | 10352604  | TGACCCTAGGACACAGCTGCAT      | 1   | + | NM_003331                                                               | - |   |   |
| chr19 | 50618574  | 50618595  | TGACGCTATGGAGCTCTCGGA       | 1   | - | NM_001166049;NM_001983;NM_202001                                        | - |   |   |
| chr17 | 78009558  | 78009580  | TGACGCGCGGACTGTCCGAG        | 1   | - | NM_001038618;NM_001083608;NM_012336;NM_031968                           | + |   |   |
| chr1  | 148473739 | 148473760 | TGAGGCCGAGAAGCAACCGC        | 6   | + | NM_001136479                                                            | - |   |   |
| chr14 | 19881113  | 19881131  | TGAGGTGAGGTACCCCGC          | 1   | - | NM_001042618;NM_005484                                                  | + |   |   |
| chr10 | 88403986  | 88404011  | TGAGTGTGTGTGTGTGTGTGA       | 2   | - | NM_001030015;NM_033282                                                  | + |   |   |
| chr1  | 227506483 | 227506502 | TGATATGATAGAATGTGGC         | 1   | + | NM_006542                                                               | + |   |   |
| chr19 | 59061456  | 59061476  | TGCAGTCGTCGCCGGCGCGG        | 1   | - | NM_001020820                                                            | + |   |   |
| chr10 | 71833933  | 71833957  | TGCCGCTGCTGTTGCTCTGAGGC     | 2   | + | NM_004096                                                               | + |   |   |
| chr10 | 75211855  | 75211876  | TGCGGGTCTGCTGCGCGGT         | 1   | + | NM_203298                                                               | + |   |   |
| chr3  | 47798639  | 47798668  | TGCGGTCAACAACCGAGGTGGTTATGT | 1   | + | NM_003074                                                               | - |   |   |
| chr4  | 106614583 | 106614604 | TGCGGTTGGGGACCAGTGCAG       | 1   | - | NM_001034191;NM_006903;NM_176866;NM_176867;NM_176869                    | - |   |   |
| chr10 | 5766815   | 5766834   | TGCTAGCGCCGTGAGAGA          | 1   | + | NM_017782                                                               | + |   |   |
| chr19 | 2895884   | 2895904   | TGCTCACTGCGCCGGTCCG         | 1   | - | NM_021217                                                               | - |   |   |
| chr22 | 42651046  | 42651051  | TGCTGCGGATCAGGACCCGA        | 1   | + | NM_025225                                                               | + |   |   |
| chr3  | 191714388 | 191714409 | TGGACGGTCCCGCCCGCC          | 1   | - | NM_001167928;NM_001167929;NM_001167930;NM_001167931;NM_002182;NM_134470 | + |   |   |
| chr15 | 76210898  | 76210920  | TGGCCCGGGAGACGCTGCCCG       | 1   | + | NM_006383                                                               | - |   |   |
| chr4  | 38722911  | 38722930  | TGGCGCCGCTGACGGAGC          | 1   | + | NM_001007075;NM_001171654                                               | + |   |   |
| chr11 | 74137301  | 74137322  | TGGGAACTGAGGGGCTTACT        | 1   | - | NM_001098638                                                            | + |   |   |
| chr1  | 40496142  | 40496165  | TGGGCTAGTGAACGCGGCAAGT      | 4   | - | NM_005857                                                               | + |   |   |
| chr1  | 247099165 | 247099187 | TGTCCTCTCGCCCGCTCGGC        | 1   | - | NM_024836                                                               | + |   |   |
| chr14 | 90650804  | 90650826  | TGTGCTGCGGAGCCAGAAC         | 2   | - | NM_001102367                                                            | + |   |   |
| chr1  | 111308025 | 111308047 | TTCGGTTTCTGCGCGGTGCGC       | 1   | - | NM_001006945;NM_018372                                                  | - |   |   |
| chr10 | 52054087  | 52054111  | TTCGCAAACCTGCTGCTGGCTTCC    | 1   | - | NM_147156                                                               | - |   |   |
| chr8  | 62789909  | 62789931  | TTCGGTTTCCAGTTTGTCTCG       | 1   | + | NM_001164754;NM_001164755;NM_001164756;NM_04318;NM_032466               | - |   |   |
| chr2  | 85515224  | 85515248  | TCTCACTACTGCACTGACTAGA      | 2   | + | NM_198482                                                               | + |   |   |

| chromosome | genome start | genome stop | tag                           | count | strand | refseq transcript(s)                                                   | refseq strand | partial tRNA overlap | tRNA match |
|------------|--------------|-------------|-------------------------------|-------|--------|------------------------------------------------------------------------|---------------|----------------------|------------|
| chr1       | 27089792     | 27089809    | AAAAGCTGGGTTGAGTG             | 1     | -      | NM_018066                                                              | -             |                      |            |
| chr3       | 47530298     | 47530321    | AAACGATGGGCTTCTGTGCGA         | 1     | +      | NM_001031703                                                           | -             |                      |            |
| chr1       | 15351381     | 15351407    | AACAGCTCGACAGAACCTTGGCGTCC    | 1     | -      | NM_001136216;N<br>M_001136217                                          | +             |                      |            |
| chr4       | 76817530     | 76817553    | AACTCGCGCTCTCCGGCTTCCG        | 1     | -      | NM_012297;NM_2<br>03504;NM_203505                                      | -             |                      |            |
| chrX       | 103288748    | 103288771   | AAGAGCACAGACTTTGAAACCTG       | 1     | +      | NM_001012755                                                           | -             |                      |            |
| chr19      | 1799667      | 1799683     | AAGGTCGGGCGGCGGC              | 1     | -      | NM_020695                                                              | -             |                      |            |
| chr1       | 84745130     | 84745154    | AATCGGTTTTTCTGAAGGAGATTG      | 1     | +      | NM_005274                                                              | -             |                      |            |
| chr22      | 29317806     | 29317830    | ACGTGGAGCGATGGGAGGCCTGA       | 1     | -      | NM_014303                                                              | -             |                      |            |
| chr17      | 6880093      | 6880114     | ACTCAGTCCACCCTCTGGCT          | 1     | +      | NM_201566                                                              | +             |                      |            |
| chr7       | 91602144     | 91602167    | ACTGGGGCACCTCGAACTGTGGC       | 1     | +      | NM_000786;NM_0<br>01146152                                             | -             |                      |            |
| chr4       | 104009346    | 104009371   | ACTGTGTGCGATGAGATAAGCATGT     | 1     | -      | NM_001008388;N<br>M_181890;NM_18<br>1893                               | +             |                      |            |
| chr17      | 53784509     | 53784531    | AGAACAACAGGGAGATAGACGA        | 1     | +      | NM_003168                                                              | -             |                      |            |
| chr1       | 44229542     | 44229565    | AGCGCTTGAGAACCCAGGATGGC       | 1     | -      | NM_152499                                                              | +             |                      |            |
| chr1       | 159550660    | 159550684   | AGCTCTGCCTAGCTGTTTGTGG        | 1     | -      | NM_001035511;N<br>M_001035512;NM<br>_001035513;NM_0<br>03001           | +             |                      |            |
| chr6       | 44295156     | 44295182    | AGGCTCCGAAAGGGACGGGTTAGG      | 1     | -      | NM_001078174;N<br>M_004955                                             | +             |                      |            |
| chr7       | 142788539    | 142788559   | AGGCTGCTCCGACCGGGAC           | 1     | +      | NM_001010972;N<br>M_003461                                             | +             |                      |            |
| chr7       | 142788539    | 142788562   | AGGCTGCTCCGACCGGGACGCA        | 1     | +      | NM_001010972;N<br>M_003461                                             | +             |                      |            |
| chr16      | 2873272      | 2873293     | AGGTAACAGCGGAGCTGAGG          | 1     | +      | NM_001142499;N<br>M_001142500;NM<br>_138439                            | +             |                      |            |
| chr9       | 139220354    | 139220377   | AGGTTGGAACCTGAAAGAGAAGA       | 1     | +      | NM_001144026;N<br>M_001144027;NM<br>_001144028;NM_0<br>14434;NM_053045 | +             |                      |            |
| chr19      | 4675075      | 4675104     | ATCAGGGCGTTGGTGTATAGTGGTTAGC  | 1     | +      | NM_139159                                                              | -             |                      |            |
| chr19      | 8361277      | 8361298     | ATCCGCGCGAAGCCAGGA            | 1     | +      | NM_004218                                                              | +             |                      |            |
| chr15      | 63948446     | 63948468    | ATCTCGGTGGAACTGCATTGG         | 1     | -      | NM_004663                                                              | +             |                      |            |
| chr1       | 40399658     | 40399682    | ATGGCGGACGAAAGGGAGACGCC       | 1     | +      | NM_012421                                                              | +             | x                    |            |
| chr15      | 78003542     | 78003569    | ATTCGGGGAGACGTAGTTACTTTGTT    | 1     | +      | NM_001100880                                                           | -             |                      |            |
| chr22      | 41877336     | 41877358    | CACCTCTCCCGGGACGCGCT          | 1     | -      | NM_000714;NM_0<br>07311                                                | +             |                      |            |
| chr8       | 38082602     | 38082605    | CACGGGCGGTGGGAGCTGAGG         | 1     | +      | NM_001105214;N<br>M_004674                                             | +             |                      |            |
| chr17      | 31231431     | 31231460    | CAGCACGTGGACTCGCACAGCTCTCCC   | 1     | -      | NM_002985                                                              | -             |                      |            |
| chr11      | 63809932     | 63809954    | CCACGACCTGAGCCGGCTCTCC        | 1     | +      | NM_001170880;N<br>M_020155                                             | +             |                      |            |
| chr9       | 102155160    | 102155182   | CCCCCTGCTGTGGGAACCGG          | 1     | +      | NM_001161584;N<br>M_017746                                             | -             |                      |            |
| chr11      | 66162779     | 66162800    | CCCTGCTGTTTCTGTGCGGG          | 1     | +      | NM_002896                                                              | +             |                      |            |
| chr19      | 3013611      | 3013634     | CCGCCTCCCGTGGCCGCCCGC         | 1     | +      | NM_001130;NM_1<br>98969;NM_198970                                      | -             |                      |            |
| chr1       | 1500261      | 1500282     | CCGCGGCCCGGCTTTCGTCT          | 1     | +      | NM_014188                                                              | -             |                      |            |
| chr15      | 72694300     | 72694321    | CCGGCTCCTCGAGCGTCCGCGC        | 1     | -      | NM_001130028                                                           | +             |                      |            |
| chr17      | 57909620     | 57909646    | CCGGCTGACGGGCCCAACGCGAGGG     | 1     | -      | NM_001112707;N<br>M_006852                                             | +             |                      |            |
| chr7       | 27206742     | 27206750    | CCTCTGGGACTGTTTTCTTCCAG       | 1     | +      | NM_000522                                                              | -             |                      |            |
| chr6       | 31902990     | 31902997    | CCTGAGAAACGGACCGGCTCTC        | 1     | -      | NM_005346                                                              | +             |                      |            |
| chr5       | 151118532    | 151118554   | CCTGGACGGAGAGAGAGGTGA         | 1     | +      | NM_004045                                                              | -             |                      |            |
| chr8       | 57149594     | 57149605    | CGCGGTGTAAGGGCTGAGGATT        | 1     | -      | NM_001023;NM_0<br>01146227                                             | -             | x                    |            |
| chr9       | 139619975    | 139619990   | CGGTGAGGCCCGCGC               | 1     | +      | NM_152285                                                              | +             | x                    | x          |
| chr18      | 802823       | 802827      | CGTAGCCCTGAGAAG               | 1     | -      | NM_005433                                                              | -             |                      |            |
| chr10      | 70517908     | 70517933    | CTAAGTTGGTCATGATGCAGAAGCTACTC | 1     | +      | NM_002727                                                              | +             |                      |            |
| chr8       | 42870808     | 42870828    | CTCTGTGCGCCGGAACCTGGC         | 1     | -      | NM_001160223;N<br>M_001160224;NM<br>_001160225;NM_0<br>30954;NM_032410 | -             |                      |            |
| chr13      | 31787665     | 31787685    | CTGCTGCGCTCTGCTGCGC           | 1     | +      | NM_000059                                                              | +             |                      |            |
| chr22      | 35255536     | 35255557    | CTGCTTAATGTGAACTCAGC          | 1     | +      | NM_003753                                                              | -             |                      |            |
| chr19      | 12638446     | 12638470    | CTGGACTCAGCAGGCCCTGGACC       | 1     | -      | NM_000528;NM_0<br>01099737;NM_001<br>173498                            | -             |                      |            |
| chr20      | 30409527     | 30409548    | CTGGGTGGAGTCTCGGAGGT          | 1     | -      | NM_001164603;N<br>M_015338                                             | +             |                      |            |
| chr13      | 99539405     | 99539425    | CTGGTCTGCTCCGACGGCGC          | 1     | +      | NM_000282;NM_0<br>01127692                                             | +             | x                    |            |
| chr4       | 6693093      | 6693116     | CTTCCCGTTACTCTGTGCGTC         | 2     | -      | NM_033296                                                              | +             |                      |            |
| chr19      | 54160428     | 54160452    | GAACAGATCCGGGACTCTCTCC        | 1     | +      | NM_000146                                                              | +             | x                    |            |
| chr21      | 44544268     | 44544290    | GACGGACCTGGACGGAGCAGG         | 1     | -      | NM_002626                                                              | +             |                      |            |
| chr1       | 226202219    | 226202244   | GAGCGCATGGTCCGCCCGGAGGC       | 1     | -      | NM_003395                                                              | -             |                      |            |
| chr6       | 26264536     | 26264563    | GAGTCCCGCCAGTGCCTCTGCTCCG     | 1     | +      | NM_005321                                                              | +             | x                    |            |
| chr5       | 87600363     | 87600386    | GAGTCTCTCGCTCAAGGACCGG        | 1     | -      | NM_153354                                                              | -             |                      |            |
| chr4       | 8322424      | 8322446     | GATGCCCTGCCCTGACGC            | 1     | +      | NM_053044                                                              | +             | x                    | x          |

|       |           |           |                              |    |   |                                                  |   |   |   |
|-------|-----------|-----------|------------------------------|----|---|--------------------------------------------------|---|---|---|
| chr3  | 50687564  | 50687588  | GATGCGCCGCCACTGCCCGCGC       | 1  | + | NM_004947                                        | + |   |   |
| chr5  | 141318752 | 141318776 | GATTCCAGAAGCTGCAAGAACCTG     | 1  | + | NM_016580                                        | - |   |   |
| chr2  | 85051353  | 85051376  | GCCCCGCTGGGGCGGCCTAGG        | 1  | - | NM_020122                                        | + |   |   |
| chr18 | 18969711  | 18969732  | GCCGCCATTGTGCTCGTCTGC        | 1  | - | NM_001100619                                     | + |   |   |
| chr1  | 22136374  | 22136395  | GCCGCGTGTCCCGAGCTGGC         | 1  | - | NM_005529                                        | - |   |   |
| chr10 | 82158144  | 82158166  | GCCGCGTCTCTAGCTCCGGT         | 1  | - | NM_032333                                        | + |   |   |
| chr1  | 94117463  | 94117485  | GCCTTCTACAGCTCTGAAATGC       | 1  | - | NM_014597                                        | - |   |   |
| chr8  | 103737094 | 103737122 | GCGTCTGAGCGCGCGCGGGAGCGG     | 1  | - | NM_005655                                        | - | x |   |
| chr6  | 36103313  | 36103339  | GCGGACCGGGGAAGGAAGAGAGAAGC   | 1  | - | NM_001315;NM_139012;NM_139013;NM_139014          | + |   |   |
| chr1  | 153222457 | 153222477 | GGAACAAGGGAAAGAGCCGG         | 1  | + | NM_025207;NM_201398                              | + |   |   |
| chr15 | 70863117  | 70863143  | GGAAGAGGCGCGGCTAGGAAAGGAG    | 1  | - | NM_031284                                        | - |   |   |
| chr22 | 29886049  | 29886069  | GGAGGAACCTTGAGCTTCG          | 1  | - | NM_001135824;NM_001135825;NM_152267              | - |   |   |
| chr22 | 29886048  | 29886069  | GGAGGAACCTTGAGCTTCGG         | 9  | - | NM_001135824;NM_001135825;NM_152267              | - |   |   |
| chr22 | 29886047  | 29886069  | GGAGGAACCTTGAGCTTCGGC        | 28 | - | NM_001135824;NM_001135825;NM_152267              | - |   |   |
| chr22 | 29886046  | 29886069  | GGAGGAACCTTGAGCTTCGGCA       | 4  | - | NM_001135824;NM_001135825;NM_152267              | - |   |   |
| chr12 | 119609348 | 119609365 | GGAGGCTGAGAGCGAC             | 1  | + | NM_014730                                        | + | x |   |
| chr1  | 44213225  | 44213246  | GGGACGGACGGTGGACGCTGG        | 1  | + | NM_001039457;NM_004047                           | + |   |   |
| chr22 | 40414935  | 40414958  | GTCGAAGAAGGAACGTACTTTGG      | 1  | + | NM_001003796                                     | - |   |   |
| chr1  | 74436344  | 74436364  | GTCTCAGGAGCAGATGGCCG         | 1  | - | NM_001105659;NM_001112808;NM_003838              | - |   |   |
| chr12 | 94953922  | 94953945  | GTGCGGTTCTCGTTAGTATAGT       | 1  | + | NM_000895                                        | - |   |   |
| chr9  | 35647998  | 35648017  | GTGGTTCGTGCTGAAGGCC          | 1  | - | NM_174923                                        | + |   |   |
| chr9  | 35647995  | 35648017  | GTGGTTCGTGCTGAAGCCTGT        | 1  | - | NM_174923                                        | + |   |   |
| chr3  | 168854292 | 168854315 | GTTAGTTAAAGAGATTTTGGGA       | 1  | - | NM_178824                                        | - |   |   |
| chr17 | 59923568  | 59923589  | GTTGAGTGATGGGAGAGTGTG        | 1  | - | NM_007215                                        | - |   |   |
| chr10 | 70517882  | 70517910  | GTTGGCGTGCAGCTGGGAGAGCTAGACT | 2  | + | NM_002727                                        | + | x |   |
| chr1  | 166516914 | 166516929 | GTTGGGTAACGGCTC              | 1  | + | NM_005149                                        | + |   |   |
| chr11 | 70841925  | 70841950  | TACCTCGTGGGACCTGGTCTTGC      | 1  | + | NM_018161                                        | + |   |   |
| chr6  | 49538912  | 49538934  | TACGCCCCAGAGTCGTCCGGC        | 1  | - | NM_000255;NM_018132                              | - |   |   |
| chr7  | 155129946 | 155129968 | TCAAACATTTGGGTTTCAGGAG       | 1  | + | NM_053043                                        | + |   |   |
| chr1  | 111545113 | 111545136 | TCACCTCTCAACTTGGTCAACGG      | 1  | + | NM_024901                                        | - |   |   |
| chr10 | 1085229   | 1085253   | TCAGAGCTCTCGAGGCTCGCGTTC     | 1  | + | NM_004508                                        | - |   |   |
| chr11 | 113149599 | 113149622 | TCAGCGTTGGTTCCCGTCTTGGC      | 1  | - | NM_004724                                        | - |   |   |
| chr1  | 233358821 | 233358842 | TCAGGCTCTGCCGCGGACGAC        | 1  | - | NM_014765                                        | - |   |   |
| chr4  | 658407    | 658426    | TCCACACCCAGACTGCGG           | 1  | + | NM_007100                                        | - |   |   |
| chr3  | 41215645  | 41215667  | TCCCTGTCCCAAGCCCGACGC        | 1  | - | NM_001098209;NM_001098210;NM_001904              | + |   |   |
| chrX  | 68301963  | 68301985  | TCCGAGAGCTCTGCTTCTCTGA       | 1  | - | NM_001032396;NM_022368;NM_145119                 | - |   |   |
| chr4  | 141897180 | 141897203 | TCGAGCTCCCGAAGTCGCCGCGC      | 1  | + | NM_015130                                        | - |   |   |
| chr10 | 104604021 | 104604040 | TCGCTAACTGAAATGATGG          | 1  | + | NM_001136200;NM_144591                           | + |   |   |
| chr16 | 3010411   | 3010413   | TCGCTGCGCCGGTTGCTGCGGC       | 1  | + | NM_016639                                        | + | x |   |
| chr9  | 135192878 | 135192899 | TCGGCGTTCGTTGGCCGCGC         | 1  | - | NM_006753                                        | - |   |   |
| chr3  | 40541265  | 40541287  | TCTAAGCCCGCTTCTCCGGC         | 1  | - | NM_001098414;NM_198484                           | + | x |   |
| chr2  | 88136331  | 88136353  | TCTCCGCCACTCCACCGCGC         | 1  | - | NM_016618                                        | - |   |   |
| chr2  | 10870577  | 10870599  | TCTCGGCTCGACCGCTCAGC         | 1  | + | NM_005742                                        | - |   |   |
| chr17 | 70256396  | 70256417  | TCTCTCGGCTCCTCGCGGCTC        | 1  | + | NM_004252                                        | + | x | x |
| chr17 | 70256396  | 70256418  | TCTCTCGGCTCCTCGCGGCTCG       | 35 | + | NM_004252                                        | + | x | x |
| chr17 | 70256396  | 70256419  | TCTCTCGGCTCCTCGCGGCTCGC      | 77 | + | NM_004252                                        | + | x | x |
| chr17 | 70256396  | 70256420  | TCTCTCGGCTCCTCGCGGCTCGCG     | 3  | + | NM_004252                                        | + | x |   |
| chr3  | 185562060 | 185562083 | TCTGCTCTCGGCTCCCGGCTG        | 1  | - | NM_001171087;NM_001171088;NM_001171089;NM_004366 | - |   |   |
| chr9  | 35647951  | 35647972  | TCTGTTCTCCCTTTCCGCC          | 1  | - | NM_174923                                        | + |   |   |
| chr8  | 48813216  | 48813231  | TGAAGAGCGCGCGC               | 1  | + | NM_005195                                        | - | x |   |
| chr15 | 83724873  | 83724896  | TGAAGCGCTGTGCTCTGCCGAG       | 9  | + | NM_006738;NM_007200                              | + | x | x |
| chr15 | 83724873  | 83724897  | TGAAGCGCTGTGCTCTGCCGAGA      | 4  | + | NM_006738;NM_007200                              | + |   |   |
| chr19 | 10352582  | 10352604  | TGACCTAGGACACAGCTGCAT        | 3  | + | NM_003331                                        | - |   |   |
| chr1  | 89763051  | 89763072  | TGAGCCCGCAGCTCCGGCAG         | 1  | + | NM_001134476                                     | + |   |   |
| chr1  | 148473739 | 148473760 | TGAGCCGAGAAGCAACCGC          | 1  | + | NM_001136479                                     | - |   |   |
| chr10 | 88403985  | 88404011  | TGAGTGTGTGTGTGTGTGTGTGAA     | 1  | - | NM_001030015;NM_033282                           | + |   |   |
| chr2  | 27127643  | 27127659  | TGCCCCATCTCCAC               | 1  | + | NM_001035507;NM_021831                           | + |   |   |
| chr19 | 62703102  | 62703124  | TGCCGGAAGCTGTTGTTGCT         | 1  | + | NM_198542                                        | + |   |   |
| chr7  | 6065463   | 6065491   | TGCGCTCTGGTGGGCTCGTACCGGCG   | 1  | + | NM_001134335;NM_014413                           | - |   |   |
| chr9  | 35647986  | 35648009  | TGCTGAAGGCTGTATCCTAGGC       | 1  | - | NM_174923                                        | + |   |   |
| chr9  | 109292102 | 109292120 | TGGAGCCGAGCTGACGCC           | 1  | + | NM_004235                                        | - |   |   |
| chr6  | 27966525  | 27966548  | TGGCCCGACGAAGCAGACAGCT       | 1  | - | NM_003535                                        | - |   |   |
| chr5  | 133775608 | 133775629 | TGGCTCTCAGACCGCCGAG          | 1  | + | NM_080656                                        | - |   |   |



|       |           |           |                           |   |   |                                             |   |   |  |
|-------|-----------|-----------|---------------------------|---|---|---------------------------------------------|---|---|--|
| chr14 | 19881113  | 19881135  | TGGCTGAGGTGAGGTACCCCGC    | 1 | - | NM_001042618;N<br>M_005484                  | + |   |  |
| chr17 | 31974698  | 31974720  | TGGGCCCGCGCCCTTCTCGGA     | 1 | - | NM_024835                                   | + |   |  |
| chr1  | 40496143  | 40496165  | TGGGCTAGTGAACGCGGCGAAG    | 1 | - | NM_005857                                   | + |   |  |
| chr1  | 40496142  | 40496165  | TGGGCTAGTGAACGCGGCGAAGT   | 1 | - | NM_005857                                   | + |   |  |
| chr1  | 204875270 | 204875293 | TGGGTCCCTGGCGGAGCTGTAG    | 1 | - | NM_001004023;N<br>M_003582                  | + |   |  |
| chr2  | 48521240  | 48521265  | TGGTCCAAGATGGCGACCTGGAACG | 1 | - | NM_001135629;N<br>M_001135630;NM<br>_152994 | + |   |  |
| chr14 | 90650804  | 90650826  | TGTGCCTGCGGAGCCAGAAC      | 1 | - | NM_001102367                                | + |   |  |
| chr1  | 28842119  | 28842139  | TTCCTGGGGCAGTCTCTGC       | 1 | - | NM_001135218;N<br>M_005644                  | - |   |  |
| chr2  | 20714507  | 20714529  | TTCCGGAGCACCCAGGCTGAGC    | 1 | + | NM_022460                                   | - |   |  |
| chr2  | 85515224  | 85515248  | TTCTCACTACTGCACTTGACTAGA  | 3 | + | NM_198482                                   | + |   |  |
| chr7  | 148523568 | 148523588 | TTCTTCTTCCCTGGCCGA        | 1 | + | NM_003575                                   | + |   |  |
| chr1  | 41100505  | 41100518  | TTGCTCCGCCCGCCGAGC        | 1 | - | NM_133467                                   | - | x |  |
| chr15 | 43280712  | 43280732  | TTGTGGAAACAATGGTACGG      | 1 | + | NM_138356                                   | - |   |  |
| chr15 | 43280712  | 43280735  | TTGTGGAAACAATGGTACGGCAA   | 2 | + | NM_138356                                   | - |   |  |

Supplementary Table S8. List of asmiRNA tags recovered across phylogenetically-diverse animals and *Arabidopsis*.

Mouse

| miRNA loci   | Sequences               | ES cells-Whitehead | ES cells-UCSF | oocytes |
|--------------|-------------------------|--------------------|---------------|---------|
| miR-126-3p   | primary sense isomir    | 179                |               |         |
|              | AUUUUAUACUCACGGUACGAGUU | 1                  |               |         |
| miR-126-5p   | CAUUUUAUACUUUUGGUACGCG  |                    | 105           |         |
|              | CGCGUACCAAAGUAAUAAUGU   |                    | 1             |         |
| miR-150*     | primary sense isomir    | 4                  |               |         |
|              | UCCCCAGGCCUGUACCAGGGU   | 1                  |               |         |
| miR-24-1*    | primary sense isomir    | 9                  |               |         |
|              | UGAUUACAGCUCAGUAGGCAC   | 1                  |               |         |
|              | UGAUUACAGCUCAGUAGGCA    | 1                  |               |         |
| miR-24       | primary sense isomir    | 3272               |               | 3684    |
|              | UGUUCUGCUGAACUGAGCCAG   | 1                  |               | 1       |
|              | GUUCUGCUGAACUGAGCCAGU   | 1                  |               | 3       |
|              | UUCUGCUGAACUGAGCCAGU    |                    |               | 2       |
|              | UGUUCUGCUGAACUGAGCCAGU  |                    |               | 1       |
| miR-291a-5p  | primary sense isomir    | 9685               | 32437         |         |
|              | GGGCCUCCACUUUGAUGGCCG   | 1                  | 0             |         |
|              | AGAGGGCCUCCACUUUGAUGGCC | 1                  | 1             |         |
| miR-1-1-3p   | UGGAAUGUAAAAGAAGUAUGUAU |                    | 77            |         |
|              | ACAUACUUCUUUACAUUCCAUA  |                    | 2             |         |
|              | UACAUACUUCUUUACAUUCCA   |                    | 1             |         |
| miR-124-1*   | CGUGUUCACAGCGGACCUUGAU  |                    | 55            |         |
|              | UCAAGGUCCGUGUGAACACGG   |                    | 1             |         |
| miR-141*     | CAUCUUCAGUGCAGUGUUGGA   |                    | 37            |         |
|              | CAACACUGCACUGGAAGAUG    |                    | 1             |         |
| miR-218-2-5p | UUGUGCUUGAUUAACCAUGUG   |                    | 42            |         |
|              | AUGGUUAGAUCAAGCACAAA    |                    | 1             |         |
| miR-219-1-3p | AGAGUUGCGUCUGGACGUCCCG  |                    | 4             |         |
|              | GGACGUCCAGACGCAACUCUCG  |                    | 1             |         |
| miR-335-5p   | UCAAGAGCAAUAACGAAAAAUG  |                    | 491           |         |
|              | CAUUUUUCGUUAUUGCUCUUGA  |                    | 1             |         |
| miR-337-5p   | CGGCGUCAUGCAGGAGUUGAUU  |                    | 788           |         |
|              | ACUCCUGCAUGACGCCGUUCCC  |                    | 1             |         |
| miR-337-3p   | primary sense isomir    |                    |               | 4       |
|              | AGAAAGGCAUCAUAUAGGAGCUG |                    |               | 1       |
| miR-338-3p   | UCCAGCAUCAGUGAUUUUGUUGA |                    | 26            | 16      |
|              | UCAACAAAUCACUGAUGCUG    |                    | 1             |         |
|              | UCAACAAAUCACUGAUGCUGGA  |                    |               | 1       |
| miR-34b-3p   | primary sense isomir    |                    |               | 8       |
|              | UGGCAGUGGAGUUAGUGAUUGU  |                    |               | 2       |

References: 19, 20, 21

Chicken

| miRNA loci  | Sequences               | embryo |
|-------------|-------------------------|--------|
| miR-10a     | primary sense isomir    | 38445  |
|             | CAAUUUCGGAUCUACAGGGUAC  | 1      |
| miR-10a*    | primary sense isomir    | 219    |
|             | UCCCCUAGAUACGAAUUUGUG   | 1      |
| miR-124a-5p | primary sense isomir    | 648    |
|             | UCAAGGUCCGUGUGAACACGG   | 78     |
|             | CAAGGUCCGUGUGAACACGG    | 6      |
|             | UCAAGGUCCGUGUGAACACGGA  | 1      |
| miR-126     | primary sense isomir    | 908    |
|             | GCAUUUUAUACUCACGGUACGAG | 1      |
| miR-1559-3p | primary sense isomir    | 15     |
|             | CUCGAUGCAUACAUGUAACUCC  | 4      |
|             | GCUCGAUGCAUACAUGUAACUCC | 1      |
| miR-1751    | primary sense isomir    | 2      |
|             | GAUGCAGGAACAGAGCAGCUCA  | 2      |
| miR-184-5p  | primary sense isomir    | 2      |
|             | UGGGCUGGAAAAGUGAUAAAGGG | 3      |
|             | UGGGCUGGAAAAGUGAUAAAGGG | 1      |
| miR-187-5p  | primary sense isomir    | 186    |
|             | CAUGUCCUGUGUUGUAGCCGG   | 1      |
| miR-193a-5p | primary sense isomir    | 625    |
|             | AUCUCGCCCGCAAAGACCCAG   | 1      |
| miR-193a-3p | primary sense isomir    | 469    |
|             | UGGGACUUUGUAGGCCAGUUGA  | 2      |

|                          |                          |      |
|--------------------------|--------------------------|------|
| miR-199-2-5p             | primary sense isomir     | 4044 |
|                          | AGGUAGUCUGAACACUGGGGCG   | 1    |
| miR-205a                 | primary sense isomir     | 605  |
|                          | GACUCCGGUGGAAUGAAGGACA   | 1    |
|                          | CAGACUCCGGUGGAAUGAAGGA   | 1    |
| miR-205b                 | primary sense isomir     | 209  |
|                          | GAUUCGGUGGAAUGAAGGGCA    | 1    |
| miR-21-3p                | primary sense isomir     | 292  |
|                          | CAGCCUACCGACUGUUGUUGCC   | 1    |
| miR-216b-5p              | primary sense isomir     | 1576 |
|                          | UCACAUUUGCCUGCAGAGAUUU   | 5    |
|                          | UCACAUUUGCCUGCAGAGAUU    | 1    |
|                          | CACAUUUGCCUGCAGAGAUUU    | 1    |
| miR-217-3p               | primary sense isomir     | 18   |
|                          | AAUGCAUUAGGAACUGAUGGUG   | 1    |
| miR-219-5p               | primary sense isomir     | 1651 |
|                          | CACAAGAAUUGCGUUUGGACAA   | 2043 |
|                          | CACAAGAAUUGCGUUUGGACA    | 1829 |
|                          | CACAAGAAUUGCGUUUGGACAAU  | 1456 |
|                          | ACAAGAAUUGCGUUUGGACAAU   | 149  |
|                          | AGAAUUGCGUUUGGACAAUCA    | 107  |
|                          | CACAAGAAUUGCGUUUGGAC     | 94   |
|                          | ACAAGAAUUGCGUUUGGACAA    | 89   |
|                          | ACAAGAAUUGCGUUUGGACA     | 57   |
|                          | AGAAUUGCGUUUGGACAAUCAG   | 52   |
|                          | GCACAAGAAUUGCGUUUGGACA   | 12   |
|                          | AGAAUUGCGUUUGGACAAUC     | 10   |
|                          | AAGAAUUGCGUUUGGACAAUCA   | 7    |
|                          | GCACAAGAAUUGCGUUUGGACAA  | 3    |
|                          | CAAGAAUUGCGUUUGGACAAUCA  | 2    |
|                          | CAAGAAUUGCGUUUGGACAAU    | 2    |
|                          | AGAAUUGCGUUUGGACAAU      | 2    |
|                          | AAGAAUUGCGUUUGGACAAU     | 2    |
|                          | GCACAAGAAUUGCGUUUGGACAAU | 1    |
| CACAAGAAUUGCGUUUGGACAAUC | 1                        |      |
| ACAAGAAUUGCGUUUGGACAAUC  | 1                        |      |
| AAGAAUUGCGUUUGGACAAUCAG  | 1                        |      |
| miR-219-3p               | primary sense isomir     | 7222 |
|                          | GAUGUCCAGACACAAUUCUUG    | 19   |
|                          | AGAUGUCCAGACACAAUUCUUG   | 8    |
|                          | GAUGUCCAGACACAAUUCUU     | 4    |
|                          | AGAUGUCCAGACACAAUUCUU    | 1    |
| miR-24-5p                | primary sense isomir     | 4    |
|                          | AUAUCAGCUCAGUAGGCACCGG   | 2    |
| miR-365-1                | primary sense isomir     | 340  |
|                          | AGGAUUUUUAGGGGCAUUAUGA   | 3    |
|                          | AGGAUUUUUAGGGGCAUUAU     | 1    |
| miR-449c*                | primary sense isomir     | 3    |
|                          | UGGAGUGCCGUGAGCAGCUGU    | 1    |
| miR-7                    | primary sense isomir     | 2477 |
|                          | AACAAAUCACUAGUCUCCAGA    | 1    |
| miR-7-2-3p               | primary sense isomir     | 18   |
|                          | AGGCAGACUGUGACUUGUUGU    | 105  |
|                          | AGGCAGACUGUGACUUGUUG     | 15   |
|                          | AGGCAGACUGUGACUUGUUGUG   | 4    |

Reference: 22

*Drosophila melanogaster*

| miRNA loci | Sequences               | embryo | head tissue | body tissue |
|------------|-------------------------|--------|-------------|-------------|
| miR-276a   | primary sense isomir    | 26407  |             |             |
|            | AGCACGGUAUGAAGUCCUAC    | 3      |             |             |
| miR-305    | primary sense isomir    | 21848  |             | 832         |
|            | CAGAGCACCUGAUGAAGUACAAU | 14     |             | 1           |
|            | CAGAGCACCUGAUGAAGUACAA  | 1      |             |             |
| miR-307*   | primary sense isomir    |        | 1403        |             |
|            | UCACACCCAGGUUGAGUGAGUC  |        | 1           |             |
| miR-92a    | primary sense isomir    | 41615  |             |             |
|            | GCCGGGACAAGUGCAAUGUUUA  | 3      |             |             |
| miR-978*   | primary sense isomir    | 14     |             |             |
|            | UAAGCCAGUGGCGUAGAUUGCA  | 1      |             |             |
| miR-984    | primary sense isomir    |        | 4           |             |
|            | AUCCAACCGUAUUUACCUCA    |        | 2           |             |
|            | primary sense isomir    | 7307   | 16          | 11          |

|              |                         |     |   |   |
|--------------|-------------------------|-----|---|---|
| miR-iab-4-5p | GGAUACAUUCAGUAUACGUUUA  | 101 |   | 1 |
|              | AGGAUACAUUCAGUAUACGUUUA | 12  | 1 |   |
|              | GGAUACAUUCAGUAUACGUUU   | 6   |   |   |
|              | AGGAUACAUUCAGUAUACGUUU  | 6   |   | 1 |
| miR-iab-4-3p | primary sense isomir    | 509 |   | 3 |
|              | UUACGUUACUGAAGGUUACCG   | 10  |   | 1 |
|              | UUACGUUACUGAAGGUUACCGG  | 5   |   |   |
|              | UUACGUUACUGAAGGUUACCC   | 5   |   |   |
|              | UUACGUUACUGAAGGUUACCGGA | 1   |   |   |
|              | UUACGUUACUGAAGGUUAUA    |     |   | 1 |

References: 23, 24

*C. elegans*

| miRNA loci  | Sequences                | Bristol strain | hermaphroditic embryo | young adult | miRBase star sequence? |
|-------------|--------------------------|----------------|-----------------------|-------------|------------------------|
| miR-232-5p  | primary sense isomir     | 45             |                       | 19          | yes                    |
|             | AAAAUCAUCGAAACUGCAGGGAU  | 5              |                       |             |                        |
|             | AAAUCAUCGAAACUGCAGGGAU   | 4              |                       |             |                        |
|             | GAUAAAAUCAUCGAAACUGCA    | 3              |                       |             |                        |
|             | UAAAAUCAUCGAAACUGCAGGGAU |                |                       | 1           |                        |
| miR-239a-3p | primary sense isomir     | 888            |                       |             | yes                    |
|             | UUUGCACUAGACUAGACACUGGA  | 1              |                       |             |                        |
| miR-250-5p  | primary sense isomir     | 150            |                       |             | yes                    |
|             | GAUCACGAGGCAACUGAAGG     | 4              |                       |             |                        |
| miR-260-5p  | primary sense isomir     | 250            |                       |             | yes                    |
|             | UCUAUCGACCUGGUAAGCA      | 2              |                       |             |                        |
| miR-38      | primary sense isomir     | 12073          |                       |             |                        |
|             | CUCCAGUUUUUCUCCCGGUGAUA  | 2              |                       |             |                        |
| miR-52-3p   | primary sense isomir     | 536            | 129                   |             | yes                    |
|             | GCUACCCUUUCAUUGUAACGUGA  | 1              |                       |             |                        |
|             | GCUACCCUUUCAUUGUAACG     | 1              | 1                     |             |                        |
| miR-55-5p   | primary sense isomir     | 113            |                       |             | yes                    |
|             | UAACCGAUAGGUUUCUGCCGA    | 12             |                       |             |                        |
|             | UAACCGAUAGGUUUCUGCCGAG   | 3              |                       |             |                        |
| miR-58-5p   | primary sense isomir     |                | 28                    | 70          | yes                    |
|             | GAUGAGAUGCGAAGAGUAGGGCA  |                | 20                    | 2           |                        |
|             | GAUGAGAUGCGAAGAGUAGGGC   |                | 2                     |             |                        |
|             | GAUGAGAUGCGAAGAGUAGGGCAA |                | 1                     |             |                        |
|             | GAUGAGAUGCGAAGAGUAGG     |                | 1                     |             |                        |
| miR-60-5p   | primary sense isomir     | 317            |                       |             | yes                    |
|             | GAUUUUUUGGCACUCUCCAG     | 2              |                       |             |                        |
| miR-67-5p   | primary sense isomir     | 45             |                       |             | yes                    |
|             | UAACAACCGGCAGAAUGAGCGGA  | 3              |                       |             |                        |
| miR-67      | primary sense isomir     | 31029          |                       |             |                        |
|             | UACUCUUUCUAGGAGGUUGUGAU  | 4              |                       |             |                        |
| miR-71-3p   | primary sense isomir     | 729            | 6                     |             | yes                    |
|             | GGCGAAAAACAGAAUAGUGAUAC  | 1              |                       |             |                        |
|             | GGCGAAAAACAGAAUAGUGA     | 1              | 1                     |             |                        |
| miR-72-3p   | primary sense isomir     |                | 2                     |             | yes                    |
|             | GUGGCAGAAUGUGGCGAAGCUGA  |                | 1                     |             |                        |
| miR-74-5p   | primary sense isomir     | 82             | 4                     |             | yes                    |
|             | GCUGGGAAAGAGAUGGAAGC     | 6              |                       |             |                        |
|             | GCUGGGAAAGAGAUGGAAGCCCGA |                | 1                     |             |                        |
| miR-786-5p  | primary sense isomir     | 18             |                       |             | yes                    |
|             | AAAUACCCCAACUGAUUUCGAU   | 14             |                       |             |                        |
|             | AAAUACCCCAACUGAUUUCGA    | 1              |                       |             |                        |
| miR-786-3p  | primary sense isomir     |                | 1                     |             |                        |
|             | UGAACAUCAUUCAGGGCAUAC    |                | 1                     |             |                        |
| miR-80-5p   | primary sense isomir     | 2923           |                       |             |                        |
|             | GUUCAGAAUCAUGUCGAAAGCU   | 2              |                       |             |                        |
| miR-85-5p   | primary sense isomir     | 6              |                       |             | yes                    |
|             | UCAACUAUUGAAAAUCGGGCU    | 1              |                       |             |                        |
| miR-90-5p   | primary sense isomir     | 718            |                       | 36          | yes                    |
|             | UGAUUCGUCGUUGAAAGCCGCU   | 2              |                       | 1           |                        |
|             | GUUGAUUCGUCGUUGAAAG      | 1              |                       |             |                        |
|             | UGAUUCGUCGUUGAAAGCCGCU   |                |                       | 1           |                        |
|             | GUUGAUUCGUCGUUGAAAGCCG   |                |                       | 1           |                        |

References: 25, 26

*Arabidopsis thaliana*

| miRNA loci | Sequences            | inflorescence tissue | TAIR star sequence? |
|------------|----------------------|----------------------|---------------------|
| MIR156a-3p | primary sense isomir | 5                    | yes                 |

|                  |                           |       |     |
|------------------|---------------------------|-------|-----|
| MIR-157a-3p      | UCUGACAGAAAGAGCAGUGAGCA   | 1     |     |
| MIR-157a/157b    | UUGACAGAAGAUAGAGAGCAC     | 27123 |     |
|                  | AUCUGUGCUCUCUAUCUUCUGUCAA | 1     |     |
| MIR-157a/157b-3p | primary sense isomir      | 80    | yes |
|                  | GGUGAUGACAGAAGGCUAGAGA    | 1     |     |
|                  | GAUGACAGAAGGCUAGAGAGCA    | 1     |     |
|                  | ACAGAAGGCUAGAGAGCACAA     | 1     |     |
| MIR-157c-3p      | primary sense isomir      | 2     | yes |
|                  | GGUGACAGAAGUAUAGAGAGCAC   | 1     |     |
| MIR-161-5p       | primary sense isomir      | 13347 |     |
|                  | CCCCGAUGUAGUCACUUUCAA     | 1     |     |
| MIR-163          | primary sense isomir      | 82    |     |
|                  | UCGAAGUCCAAGUCCUCUUCAA    | 1     |     |
| MIR-169b-3p      | primary sense isomir      | 3     | yes |
|                  | AGCCGAAGGACAACUUGCCAGAAAU | 1     |     |
|                  | AGCCGAAGGACAACUUGCCAGAA   | 1     |     |
|                  | AGCCGAAGGACAACUUGCCA      | 1     |     |
| MIR-171b/171c    | primary sense isomir      | 56    |     |
|                  | UGAUUUUGGCACGGCUCAAUC     | 1     |     |
| MIR-172e-5p      | primary sense isomir      | 231   | yes |
|                  | UGAAUCUUAUUGGUGCUGCAU     | 1     |     |
|                  | UGAAUCUUAUUGGUGCUGCA      | 1     |     |
|                  | GUGAAUCUUAUUGGUGCUGCA     | 1     |     |
| MIR-172e         | primary sense isomir      | 148   |     |
|                  | UGCAGCAUCAUAAGAUUCCC      | 1     |     |
| MIR-391-3p       | primary sense isomir      | 106   | yes |
|                  | AUUGCUACGUAGGAGAGUA       | 1     |     |
| MIR-833-5p       | primary sense isomir      | 5     |     |
|                  | UUGAACUAGACCGAGUACAACAA   | 1     |     |
|                  | UAGACCGAGUACAACAAACAA     | 1     |     |
|                  | AGACCGAGUACAACAAACAAAC    | 1     |     |
|                  | AGACCGAGUACAACAAACAAA     | 1     |     |
|                  | AGACCGAGUACAACAAACAA      | 1     |     |
|                  | ACUAGACCGAGUACAACAAACA    | 1     |     |
| MIR-833-3p       | primary sense isomir      | 3     |     |
|                  | UAGACCGAUGUCAACAAACAAG    | 1     |     |
|                  | CCGAUGUCAACAAACAAGCUG     | 1     |     |
|                  | AGCUAGACCGAUGUCAACAAA     | 1     |     |
|                  | AGACCGAUGUCAACAAACAAGC    | 1     |     |
| MIR-843-3p       | primary sense isomir      | 1     | yes |
|                  | UUUAGAUCGAGCUUCACAGGA     | 1     |     |
| MIR-851-5p       | primary sense isomir      | 23    | yes |
|                  | UGGAUCGCGAACCGAGACGAC     | 1     |     |
| MIR-866-3p       | primary sense isomir      | 1     |     |
|                  | UUCAAAGACGGAUUUUGUUA      | 1     |     |
|                  | UCAAAGACGGAUUUUGUUA       | 1     |     |
|                  | CUUCAAGACGGAUUUUGUU       | 1     |     |

Reference: 27
